**Title:**

**Id4 eliminates the pro-activation factor Ascl1 to maintain quiescence of adult hippocampal stem cells**

**Short title:**

Id4 maintains quiescence of adult neural stem cells.

**Key words:**

Id proteins, E-proteins, BMP, Notch, neurogenesis

**Authors and affiliations:**

Isabelle Blomfield<sup>1</sup>, Brenda Rocamonde<sup>2</sup>, Maria del Mar Masdeu<sup>1</sup>, Eskeatnaf Mulugeta<sup>3</sup>, Stefania Vaga<sup>1,4</sup>, Debbie L. C. van den Berg<sup>3</sup>, Emmanuelle Huillard<sup>2</sup>, François Guillemot<sup>1,5\*</sup> and Noelia Urbán<sup>1,6\*</sup>.

<sup>1</sup>The Francis Crick Institute, NW1 1AT, London, UK.

<sup>2</sup>Institut du Cerveau et de la Moelle Epinière, ICM, Inserm U 1127, CNRS UMR 7225, Sorbonne Université, F-75013, Paris, France.

<sup>3</sup>Department of Cell Biology, Erasmus MC, 3015 CN Rotterdam, The Netherlands.

<sup>4</sup>Present address: Centre for Host-Microbiome Interactions, Mucosal and Salivary Biology Division, Dental Institute, King's College London, UK.

<sup>5</sup>Lead contact

<sup>6</sup>IMBA-Institute of Molecular Biotechnology of the Austrian Academy of Science, Vienna Biocenter Campus (VBC), 1030, Vienna, Austria.

\*Correspondence: François Guillemot ([francois.guillemot@crick.ac.uk](mailto:francois.guillemot@crick.ac.uk)), Noelia Urbán ([noelia.urban@imba.oeaw.ac.at](mailto:noelia.urban@imba.oeaw.ac.at)).

## SUMMARY

Quiescence is essential for the long-term maintenance of adult stem cells and tissue homeostasis. However, how stem cells maintain quiescence is still poorly understood. Here we show that stem cells in the dentate gyrus of the adult hippocampus actively transcribe the pro-activation factor *Ascl1* regardless of their activation state. We found that the inhibitor of DNA binding protein *Id4* suppresses *Ascl1* activity in neural stem cell cultures. *Id4* sequesters *Ascl1* heterodimerisation partner *E47*, promoting *Ascl1* protein degradation and neural stem cell quiescence. Accordingly, elimination of *Id4* from stem cells in the adult hippocampus results in abnormal accumulation of *Ascl1* protein and premature stem cell activation. We also found that multiple signalling pathways converge on the regulation of *Id4* to reduce the activity of hippocampal stem cells. *Id4* therefore maintains quiescence of adult neural stem cells, in sharp contrast with its role of promoting the proliferation of embryonic neural progenitors.

## INTRODUCTION

Tissue stem cells must maintain their long-term activity while minimising the accumulation of genetic and metabolic damage. In several adult tissues, stem cells can remain inactive for long periods of time in a state of quiescence. Specific stimuli promote the exit from quiescence of different types of adult stem cells, such as hypoxia for stem cells of the carotid body or muscle injury for satellite stem cells (Dumont et al., 2015; Sobrino et al., 2018). Regulation of the transit between the quiescent and active compartments is essential to maintain an appropriate pool of stem cells able to sustain tissue homeostasis and provide an adequate response to insults over the lifespan of the organism. An excessive retention of stem cells in the quiescent compartment would not produce enough differentiated progeny to maintain functionality, as happens for instance during aging (Garcia-Prat et al., 2016; Leeman et al., 2018). On the other hand, excessive stem cell activity would eventually result in stem cell exhaustion, also leading to loss of functionality (Castilho et al., 2009; Ho et al., 2017). Quiescence is also an essential property of cancer stem cells that allows them to evade immune surveillance and results in resistance to treatment (Agudo et al., 2018).

Despite their relevance for the fields of tissue repair, aging and cancer biology, the mechanisms regulating quiescence in adult stem cells are still largely unknown.

In the adult brain, neural stem cell (NSC) populations in the subependymal zone (SEZ) of the lateral ventricles and in the dentate gyrus (DG) of the hippocampus, generate new neurons and glia that integrate into pre-existing neuronal networks (Bond et al., 2015; Lim and Alvarez-Buylla, 2016). In both regions, a large fraction of stem cells is quiescent. Extensive work has led to the identification of extracellular signals present in the SEZ and DG niches that regulate quiescent and active states (Choe et al., 2015; Silva-Vargas et al., 2013). Notch, BMP4 and the neurotransmitter GABA have been shown to maintain stem cell quiescence while Wnt and Shh are thought to promote stem cell activity (Bao et al., 2017; Choe et al., 2015; Engler et al., 2018; Imayoshi et al., 2010; Lie et al., 2005; Mira et al., 2010; Petrova et al., 2013; Qu et al., 2010; Song et al., 2012). However, little is known of the cell intrinsic machinery that NSCs employ to adjust their activity to the different signals received from the niche. *Ascl1* is one of the few intrinsic regulators of neural stem cell quiescence described so far. *Ascl1* is a basic-helix-loop-helix (bHLH) transcription factor that is present in the adult hippocampus in a fraction of dividing stem cells and intermediate progenitors. Loss of *Ascl1* completely blocks the activation of adult hippocampal stem cells, inhibits the generation of new neurons and prevents the depletion of the stem cell pool over time (Andersen et al., 2014). *Ascl1* may therefore determine the balance between quiescence and activity of hippocampal NSCs. Indeed, stabilisation of *Ascl1* protein by inactivation of the E3 ubiquitin ligase *Huwe1* resulted in over-proliferation of hippocampal stem cells and prevented their return to quiescence (Urban et al., 2016). However, *Huwe1* inactivation was not sufficient to trigger the activation of quiescent stem cells, indicating that additional mechanisms maintain the quiescent state of hippocampal stem cells.

The Id (inhibitor of differentiation/DNA binding) proteins are known inhibitors of bHLH transcription factors such as *Ascl1* (Ling et al., 2014) (Imayoshi and Kageyama, 2014). Id proteins contain a conserved HLH domain with which they dimerise with bHLH proteins. However they lack a DNA binding domain and therefore prevent bHLHs with which they interact from binding DNA and other bHLH factors (Benezra et al., 1990). In mammals, the Id family comprises four genes: *Id1-4*. *Id1-3* are co-expressed in multiple tissues during development, and have been shown to promote stemness and proliferation in different systems, including in hematopoietic stem cells and in stem cells of the adult SVZ (Niola et

al., 2012; Singh et al., 2018). In contrast, *Id4* expression rarely overlaps with that of the other *Ids* during development and it is generally thought to have an opposing function to *Id1-3* (Patel et al., 2015). For instance in the context of cancer, *Id4* has been shown to behave as a tumour suppressor, while other *Id* proteins are considered oncogenes (Patel et al., 2015; Ruzinova and Benezra, 2003; Sikder et al., 2003).

Here we show that *Ascl1* mRNA is expressed by hippocampal stem cells independently of their proliferative state, but that only active stem cells reach significant levels of *Ascl1* protein. This non-transcriptional regulation of *Ascl1* is recapitulated in hippocampal stem cell cultures in vitro, where the quiescence-inducing factor BMP4 has no effect on *Ascl1* mRNA expression but is sufficient to lower down *Ascl1* protein levels. We performed a gene expression screen in these cells and found that *Id4* is strongly induced in quiescent NSCs. *Id4* sequesters the *Ascl1* heterodimerisation partner E47 and the resulting *Ascl1* monomers, which are unable to bind DNA, are rapidly degraded by the proteasome. Therefore, *Id4* blocks the pro-activation transcriptional program driven by *Ascl1* and keeps stem cells quiescent. Indeed, elimination of *Id4* from the adult brain resulted in increased *Ascl1* protein levels in stem cells of the hippocampus and in their rapid entry into the cell cycle. The role of *Id4* in the regulation of hippocampal stem cells is unique among *Id* genes since gain- or loss-of-function of *Id1*, the only other family member expressed in a significant number of hippocampal stem cells, did not affect *Ascl1* protein levels or hippocampal stem cell proliferation. *Id4* is induced by BMP4 in NSC cultures and has been shown to be regulated by both BMP and Notch signals in embryonic neural progenitors. However, *Id4* expression was maintained in vivo in the absence of both BMP and Notch signalling, indicating that multiple niche signals converge on the induction of *Id4* to provide robustness to the quiescent state.

## RESULTS

### ***Ascl1* is transcribed in quiescent stem cells of the hippocampus**

To investigate how *Ascl1* expression is regulated in hippocampal NSCs, we first assessed the transcriptional activity of the *Ascl1* locus using the *Ascl1*<sup>K1GFP</sup> mouse reporter line, in which the GFP reporter replaces the *Ascl1* coding sequence and marks cells that transcribe the

*Ascl1* gene (Leung et al., 2007). Hippocampal stem cells in vivo will be called hereafter radial glia-like cells (RGLs) while hippocampal stem cells in culture will be called NSCs. We identified RGLs by their expression of glial fibrillary acidic protein (GFAP), localisation of their nucleus in the subgranular zone of the DG and presence of a radial process extending towards the molecular layer. We found that  $82.3\pm 3.8\%$  of all RGLs were positive for GFP in the hippocampus of P70 *Ascl1*<sup>KiGFP</sup> mice and therefore transcribed *Ascl1*. In contrast, only  $1.9\pm 0.3\%$  of these cells expressed *Ascl1* protein at a level detected with anti-*Ascl1* antibodies (Fig. 1A, 1B). Notably,  $83.8\pm 4.1\%$  of the RGLs that did not express Ki67 and were therefore quiescent expressed GFP, indicating a transcriptionally active *Ascl1* locus (Fig. 1C and 1D). Moreover, GFP immunolabeling intensity was comparable in active Ki67+ RGLs and quiescent Ki67- RGLs (Fig. 1E). We confirmed the presence of *Ascl1* transcripts at similar levels in quiescent and active RGLs using single molecule in situ hybridization (Fig. 1F, G). These results show that, unexpectedly, *Ascl1* is already expressed in quiescent RGLs and that NSC activation is not accompanied by the induction or marked upregulation of *Ascl1* transcription. The finding that quiescent and proliferating RGLs transcribe the *Ascl1* gene at comparable levels but only proliferating RGLs express detectable levels of *Ascl1* protein, indicates that *Ascl1* protein expression in quiescent hippocampal RGLs is regulated by a non-transcriptional mechanism.

### ***Ascl1* is regulated post-translationally in quiescent NSC cultures**

To investigate the mechanism regulating *Ascl1* protein levels in quiescent hippocampal stem cells, we used an established cell culture model of NSC quiescence (Martynoga et al., 2013; Mira et al., 2010; Sun et al., 2011). The signalling molecule BMP4 has been shown to contribute to the maintenance of NSC quiescence in the hippocampus (Bonaguidi et al., 2008; Mira et al., 2010). BMP4 is also able to induce a reversible state of cell cycle arrest in embryonic stem cell-derived NSC cultures (Martynoga et al., 2013). Similarly, we found that NSCs originating from the adult hippocampus and maintained in culture in the presence of FGF2 stopped proliferating and entered quiescence when exposed to BMP4 (Fig. S1A-D). RNA sequencing analysis revealed that 1839 genes were differentially expressed between NSCs in proliferating and quiescent states (Fig. S1E, F). *Ascl1* RNA levels were not significantly different between these two conditions as verified by QPCR (Fig. 2A). The intensity of GFP in cultured hippocampal NSCs derived from *Ascl1*<sup>KiGFP</sup> mice was also

comparable in proliferating and quiescent conditions (2B, C), as for GFP expression in the hippocampus of *Ascl1*<sup>K<sup>GFP</sup></sup> mice (Fig. 1E). In contrast, Ascl1 protein levels were strongly reduced in BMP-treated quiescent NSCs (Fig. 2D-F), resembling the absence of Ascl1 protein in quiescent hippocampal RGLs in vivo (Fig. 1B). Treatment of quiescent NSCs with proteasome inhibitors significantly increased the levels of Ascl1 protein, suggesting that Ascl1 mRNA is translated in quiescent NSCs but Ascl1 protein is rapidly degraded in a proteasome-dependent manner (Fig. 2G). We previously showed that Ascl1 protein is targeted for proteasomal degradation by the E3 ubiquitin ligase Huwe1 in proliferating hippocampal NSC cultures (Urban et al., 2016). We therefore asked whether Huwe1 is also responsible for the degradation of Ascl1 in quiescent NSCs. We found that Ascl1 protein was similarly reduced in *Huwe1* mutant and control NSC cultures upon addition of BMP4 (Fig. S1G, H), indicating that a *Huwe1*-independent mechanism prompts the down-regulation of Ascl1 protein in quiescent cultured NSCs. This is in agreement with our prior observation that *Huwe1* is required for the return to quiescence of proliferating RGLs but not for the maintenance of RGL quiescence in mice (Urban et al., 2016). Together, these results establish BMP-treated NSC cultures as an appropriate model to characterise the mechanisms controlling Ascl1 protein levels in quiescent hippocampal stem cells.

#### **Id4 is highly expressed in quiescent hippocampal stem cells in culture and in vivo.**

We screened our RNA-Seq data for potential Ascl1 inhibitory factors induced in quiescent conditions (Fig. S2). The four *Id* genes *Id1-4* were strongly induced in quiescent NSC cultures (Fig. S2A) and *Id3* and *Id4* are also enriched in quiescent hippocampal RGLs in vivo (Shin et al., 2015). Moreover, Id proteins have previously been shown to sequester E proteins, the dimerisation partners of Ascl1, resulting in the rapid degradation of Ascl1 monomers (Shou et al., 1999; Vinals et al., 2004). Id factors are therefore strong candidates to regulate Ascl1 post-translationally in hippocampal stem cells. Although the transcripts for the four *Id* genes were induced by BMP4 in NSC cultures (Fig. 3A), only *Id1* and *Id4* were also upregulated at the protein level (Figs 3B-D and S2B, C). Of those, *Id4* expression was highly variable and was not seen in cells presenting high levels of Ascl1, suggesting a possible negative regulatory relationship between the two proteins, while *Id1* was also expressed at various levels but without apparent relationship with Ascl1 levels (Figs 3C-E and S2D-I). Co-immunoprecipitation experiments in BMP-treated NSCs confirmed that *Id4* binds the E

protein E47 and can therefore sequester this factor away from its binding partner Ascl1 (Figs 3F and S2J).

In vivo, Id1, Id3 and Id4 proteins are expressed in the SGZ of the DG where hippocampal stem cells are located, while Id2 is expressed by granule neurons but not in the SGZ (Figs 3G and S3A-E). Id4 was expressed at high levels in quiescent hippocampal RGLs and at much lower levels in proliferating RGLs (Fig. 3G, H). Id1 was expressed in fewer RGLs and was enriched in proliferating cells, while Id3 was only expressed in very few RGLs (Fig. S3A, E). Id4 is therefore a good candidate to suppress Ascl1 protein expression and promote quiescence in hippocampal stem cells, both in culture and in vivo.

### **Id4 promotes the degradation of Ascl1 protein and induces a quiescence-like state in NSCs.**

To address the role of Id4 in Ascl1 regulation and in hippocampal stem cell quiescence, we first asked whether forcing the expression of Id4 in proliferating NSCs would be sufficient to reduce Ascl1 protein level and induce a quiescent state (Fig. 4D). Id4 expression was low in control proliferating NSCs (Fig. 3B-D) and was strongly increased after transfection with an Id4 expression construct (Fig. 4A). Id4-transfected NSCs maintained Ascl1 mRNA at levels similar to those of control NSCs but showed markedly reduced Ascl1 protein levels (Fig. 4A-C). Moreover, transfection of Id4 resulted in a significant decrease in NSC proliferation (Fig. 4E-F). The effects of Id4 protein on Ascl1 expression and NSC proliferation suggest that induction of Id4 in BMP-treated NSCs contributes to the degradation of Ascl1 protein and the induction of quiescence (Fig. 4D).

Next, we asked whether inactivating Id proteins could stabilise Ascl1 protein and revert some aspects of the quiescent state in BMP-treated NSCs. Because NSCs express the four Id proteins, which might have redundant functions, we chose to neutralize all of them by overexpressing the E protein E47. An excess amount of E47 should sequester Id proteins into E47-Id complexes, allowing the formation of Ascl1-E47 complexes and the stabilisation of Ascl1 (Fig. 4L). Indeed, overexpression of E47 in BMP-treated NSCs resulted in an increase in the levels of Ascl1 protein without significantly affecting Ascl1 mRNA levels (Fig. 4G-I). Overexpression of E47 was also sufficient to partially revert the cell cycle arrest of BMP-treated NSCs (Fig. 4J, K). Together, these results support a model whereby induction of high levels of Id4 protein in quiescent NSCs by BMP4 promotes the degradation of Ascl1 by

sequestering its dimerization partners (Fig. 4L). They also raise the possibility that suppression of the transcriptional activity of *Ascl1* is a key feature of the induction of quiescence by *Id4*.

### **Quiescence is characterised by a downregulation of *Ascl1* target genes**

To investigate the mechanism by which *Id4* induces quiescence in NSCs, we compared the transcriptome of *Id4*-overexpressing and control proliferating NSCs using RNAseq. Expression of *Id4* resulted in the up-regulation of 806 genes and down-regulation of 823 genes (Fig. 5A). *Id4*-regulated genes represented 44.2% of the genes regulated by BMP4 in NSCs, indicating that *Id4* has an important role in the induction of the gene expression programme of quiescence downstream of BMP (Figs 5B and S4A, B). The genes commonly regulated by *Id4* and BMP4 are involved in cell cycle (downregulated) and cell adhesion (upregulated) (Fig. 5C-D), which are key hallmarks of the NSC quiescent state (Llorens-Bobadilla et al., 2015; Martynoga et al., 2013; Shin et al., 2015). Direct transcriptional targets of *Ascl1* were strongly downregulated in *Id4*-overexpressing NSCs, including genes with important roles in cell cycle progression such as *Skp2*, *Cdk1*, *Cdk2* and *Foxm1* and other canonical *Ascl1* targets such as *Dll1* and *Dll3* (Castro et al., 2011; Martynoga et al., 2013) (Fig. 5E-F).

We also compared the transcriptome of *E47*-overexpressing and control BMP-treated NSCs by RNAseq analysis, which revealed the deregulation of 2387 genes. Genes upregulated in *E47*-overexpressing BMP-treated NSCs represented 40.6% of the genes downregulated when NSCs were exposed to BMP4 (Fig. S4C-E) and included several *Ascl1* target genes (Fig. S4F). Overall, our analysis indicates that induction of *Id4* by BMP4 and the subsequent degradation of *Ascl1* results in the downregulation of its targets, leading to the cell cycle arrest of NSCs (Fig. 4D).

### **Loss of *Id4* in vivo activates quiescent adult hippocampal RGLs**

We next assessed the role of *Id4* in the maintenance of the quiescent state of RGLs in vivo by analysing the hippocampus of mice carrying a conditional mutant allele of *Id4* (*Id4<sup>fl</sup>*) (Best et al., 2014) (Fig. 6A and S5A). To eliminate *Id4* from RGLs, we crossed *Id4<sup>fl/fl</sup>* mice with the *Glast-CreERT2* deleter line (Mori et al., 2006) and the Rosa-floxed EYFP reporter line (Srinivas et al., 2001) (Fig. 6A). We administered tamoxifen for 5 days to the triple



transgenic mice, which resulted in complete elimination of Id4 protein (Fig. 6B) and we analysed the brains immediately after (*Id4<sup>CKO</sup>* mice; Fig. 6A). The fraction of RGLs expressing Ascl1 increased from  $6.0 \pm 0.6$  in control mice to  $15.0 \pm 2.1$  in *Id4<sup>CKO</sup>* mice (Fig. 6C, D). Ascl1 protein levels in Ascl1-expressing RGLs were also upregulated in *Id4<sup>CKO</sup>* mice (Fig. 6D). The fraction of proliferating RGLs increased from  $5.1 \pm 1.1$  in control mice to  $12.3 \pm 1.9$  in *Id4<sup>CKO</sup>* mice (Fig. 6E, F). When *Id4<sup>CKO</sup>* mice were analysed 30 days after tamoxifen administration and *Id4* deletion, however, the rate of proliferation of RGLs was not significantly different from those found in control mice (Fig. S5D). Id1 levels were upregulated in *Id4<sup>CKO</sup>* mice (Fig. S5E); however, this upregulation is already present at P65 (Fig. S5B) meaning that loss of Id1 does not compensate for the loss of Id4. Together, these findings demonstrate that Id4 expression in hippocampal RGLs is essential for the suppression of Ascl1 protein expression and the maintenance of quiescence, and suggest that in the prolonged absence of Id4, a compensatory mechanism maintains RGLs quiescence.

#### **Id4 is regulated by multiple signalling pathways in the adult dentate gyrus.**

As Id4 function is essential for the maintenance of quiescence of hippocampal RGLs, we examined the signaling pathways that induce expression of the *Id4* gene in these cells. Since BMP4 induces *Id4* in hippocampal NSC cultures (Fig. 3A, B), we asked whether BMP signaling is required for the maintenance of Id4 expression in hippocampal RGLs. We measured Id4 expression in mice in which Smad4, an essential component of the BMP signalling pathway, has been eliminated from hippocampal RGLs (Chu et al., 2004) (Fig. 7A). Unexpectedly, Id4 levels were increased in RGLs from *Smad4<sup>CKO</sup>* mice, while Id1 expression in RGLs was severely reduced in the absence of *Smad4* (Figs 7B-E and S6A-C). Ascl1 expression and RGL proliferation remained similar in *Smad4<sup>CKO</sup>* and control mice, supporting the idea that *Id4* and not *Id1* is essential to suppress Ascl1 and maintain RGL quiescence (Fig. 7F). As Notch signaling has also been implicated in the regulation of *Id* genes (Liu and Harland, 2003), we examined Id proteins in mice in which *RBPJk*, an essential component of the Notch pathway, has been deleted (GlastCreERT2; *RBPJk<sup>fl/fl</sup>*; RYFP or *RBPJk<sup>CKO</sup>* mice (Han et al., 2002); Fig. 7G). The percentage of Id4+ RGLs was only slightly lower in these mice (Fig. 7H, I), while the fractions of Ascl1+ and proliferating RGLs were elevated compared with control mice, as previously reported (Andersen et al., 2014; Magnusson et al., 2014); Fig. S6D-E), presumably due to transcriptional upregulation of the *Ascl1* gene. We then asked whether the BMP and

Notch pathways might act redundantly to maintain Id4 expression, by generating mice in which both *Smad4* and *RBPJk* were deleted (*Smad4<sup>CKO</sup>;RBPJk<sup>CKO</sup>* mice; Fig. 7G). Id4 was expressed in a comparable fraction of RGLs in these mice as in control mice, albeit at a slightly reduced level (Fig. 7J, K). Therefore, multiple signalling pathways present in the hippocampal niche, including Notch-RBPJk, BMP-Smad4 and additional unidentified pathways, converge on the induction of Id4 to promote the degradation of *Ascl1* and maintain NSC quiescence.

## Discussion

In this study, we show that the repressor protein Id4 is essential to maintain adult hippocampal stem cells (RGLs) in a quiescent state. The function of Id4 in maintenance of RGL quiescence is in remarkable contrast with its role in promoting the proliferation of progenitor cells in the embryonic cerebral cortex (Bedford et al., 2005; Yun et al., 2004). This difference may reflect the different role of the bHLH proteins that are Id4 targets in embryonic versus adult neural lineages. In the embryonic forebrain, neural stem cells are in a proliferative state and bHLH proteins mostly act by promoting neuronal differentiation. Their inactivation by Id4 during development therefore results in a block of differentiation and extended proliferation. In contrast, in the adult hippocampus RGLs are mostly quiescent, *Ascl1* is required to promote their activity and inactivation of *Ascl1* by Id4 results in their failure to proliferate.

We also show that Id4 promotes the degradation of the pro-activation factor *Ascl1* in RGLs. As *Ascl1* protein is only detectable in a small fraction of proliferating RGLs (Andersen et al., 2014), we were not expecting the *Ascl1* gene to be transcribed by most RGLs including many quiescent cells. We found that despite *Ascl1* mRNA being expressed and translated, *Ascl1* protein does not accumulate in quiescent RGLs due to rapid degradation. This surprising finding could be the reason why single cell transcriptomic analysis of hippocampal cells did not identify *Ascl1* among the genes differentially expressed between quiescent and active stem cells (Artegiani et al., 2017; Hochgerner et al., 2018; Shin et al., 2015). This non-transcriptional control of a key activation factor is also found, for instance, in satellite stem cells where the bHLH factor *MyoD* is transcribed in quiescent cells but its translation is

inhibited by an RNA-binding protein to prevent stem cell activation (de Morree et al., 2017).

It is well established that Id proteins, including Id4, form non-functional heterodimers with E proteins, which are dimerization partners of tissue-specific bHLH transcription factors such as Ascl1 (Imayoshi and Kageyama, 2014; Ling et al., 2014; Patel et al., 2015; Sharma et al., 2015). High levels of Ids are therefore expected to result in the sequestration of E-proteins away from functional dimers with Ascl1. Non-dimerised Ascl1 is not able to bind DNA, and this alone could explain why Ascl1 target genes are downregulated in NSCs upon Id4 overexpression or BMP treatment. But how does Id4 prevent Ascl1 protein accumulation? Exposure of different cell types to BMPs has been shown to trigger the proteolytic degradation of Ascl1 (Shou et al., 1999; Vinals et al., 2004). In lung carcinoma cells, the formation of heterodimers with E47 stabilises Ascl1, and induction of Id1 by BMP2 sequesters E47, resulting in degradation of the unstable monomeric form of Ascl1 (Vinals et al., 2004). We propose that a similar mechanism promotes the degradation of Ascl1 when quiescent hippocampal stem cells express high levels of Id4.

Id4 has been proposed to act differently from other members of the Id family (Boareto et al., 2017; Patel et al., 2015; Sharma et al., 2015). Accordingly, the function that we have identified for Id4 in the hippocampus is also distinct from the role reported for other Id factors in the adult ventricular-subventricular zone (V-SVZ), where Id1 and Id3 promote stem cell self-renewal (Nam and Benezra, 2009) and Id1-3 maintain stem cell function by keeping stem cells adherent to their niche environment (Niola et al., 2012). Besides regulating the activity of tissue-specific bHLH transcriptional activators such as Ascl1, Id proteins also interact with bHLH transcriptional repressors of the Hes family (Bai et al., 2007). Direct interaction of Id2 with Hes1 blocks the autorepressive activity of Hes1 protein resulting in its stable expression at a high level. Therefore, Id proteins promote a switch of the expression pattern of Hes proteins from oscillatory, resulting in oscillatory expression of target genes such as Ascl1, to stably high, resulting in constant repression of these targets (Bai et al., 2007; Boareto et al., 2017). Id4 can inhibit the action of Id1-3 proteins by interacting with stronger affinity with them than with the E-proteins (Patel et al., 2015; Sharma et al., 2015). This non-canonical role of Id4 has been proposed to explain how Id4 promotes the proliferation of embryonic neural progenitors (Bedford et al., 2005;

Yun et al., 2004) by blocking the interaction of Id1-3 with Hes proteins and thus promoting Hes protein oscillations and progenitor proliferation (Boareto et al., 2017). *Ascl1* is transcribed in most quiescent RGLs, indicating that Hes proteins do not fully repress transcription of *Ascl1* in these cells. However, *Ascl1* expression is strongly enhanced when the Notch effector *gene* *Rbpjk* is deleted (Fig. S6D), suggesting that the Notch-RBPJk-Hes pathway partially represses *Ascl1* and maintains *Ascl1* expression at low levels. A possible scenario is that Id proteins partially stabilise Hes protein expression and thereby maintain a mild repression of *Ascl1* transcription while Id4, in addition, degrades the remaining low levels of *Ascl1* protein to maintain the quiescent state. We provide evidence that Id4 drives *Ascl1* degradation but if and how Id4 also interacts with other Id proteins to regulate hippocampal stem cell activity remains to be addressed.

Id4 is not the only Id protein expressed in hippocampal stem cells, as Id1 is also expressed in about 50% of RGLs and all Id proteins are expressed in cultured NSCs. Nevertheless, it is clear that Id4's role in regulation of stem cell quiescence is unique. While Id4 expression in vivo and in culture is restricted to stem cells that are quiescent and express low levels or no *Ascl1* protein, Id1 protein is found in stem cells that are active and express high levels of *Ascl1*, suggesting that contrary to Id4, it does not promote stem cell quiescence or the degradation of *Ascl1*. In agreement with this, Id1 has recently been shown to have a role in the activation of hematopoietic stem cells upon stress signals (Singh et al., 2018). Loss-of-function analysis provides direct evidence of the exclusive role of Id4 in the regulation of RGL activity. Deletion of *Id4* leads to a rapid increase in *Ascl1* expression and in the fraction of RGLs that proliferate. The effect of loss of *Id1* can be examined in *Smad4cKO* mice where Id1 expression in RGLs is greatly reduced while Id4 expression is unaffected. *Smad4cKO* do not show defects in *Ascl1* expression or RGL proliferation. Why Id1, which has been shown to dimerise with E proteins and promote *Ascl1* degradation in another cell type (Vinals et al., 2004) has no such effect in hippocampal stem cells is unclear. It is unknown whether Id4 also has a role distinct from that of other Id proteins in other adult stem cell populations as well.

While loss of Id4 results after a few days in a premature activation of quiescent RGLs, RGL activity and *Ascl1* expression are back to normal levels after 30 days. Thus, other Ids or unrelated factors might be induced by the loss of Id4 and compensate for it, as for instance Id1 is (Fig S5B, E). We have previously shown that the ubiquitin ligase Huwe1 degrades *Ascl1*

in proliferating RGLs and allows a fraction of these cells to return to quiescence (Urban et al., 2016). *Huwe1* function is not required in quiescent RGLs since loss of *Huwe1* does not affect the rate at which quiescent RGLs become active. *Huwe1* is expressed in quiescent RGLs (Urban et al., 2016) and although *Id4* might mask its role in degrading *Ascl1* in these cells, it might be able, in the absence of *Id4*, to eliminate excess *Ascl1* and maintain RGL quiescence.

Our transcriptomic analysis suggests that collectively, *Id* proteins contribute to a large extent to the induction by BMP of a gene expression programme promoting NSC quiescence. Overexpression of *E47* in BMP-treated NSCs results in down regulation of a large fraction of the genes that are induced by BMP4 in NSCs, and in induction of a large fraction of the genes suppressed by BMP4. Conversely, overexpression of *Id4* in the absence of BMP induces a large fraction of the genes that BMP4 induces and suppresses a large fraction of the genes suppressed by BMP4. However a subset of genes are induced or suppressed by BMP4 independently of *Id4*. Gene Ontology analysis of the regulated genes indicates that *Id4* acts downstream of BMP signaling to promote multiple aspects of NSC quiescence including the induction of cell adhesion molecules and the downregulation of cell cycle genes, many of which are *Ascl1* targets.

Given the important role of *Id4* in maintaining RGL quiescence, it seems likely that its expression is regulated by niche signals to control RGL activity. *Id* genes, including *Id4*, are well known effectors of BMP signaling in neural cells and other cell types (Ling et al., 2014; Patel et al., 2015; Samanta and Kessler, 2004). While *Id4* expression is strongly induced by BMP4 in cultured NSCs, deletion of the BMP signaling effector *Smad4* in RGLs does not reduce its expression and in fact significantly upregulates it, possibly due to a reduction in *Id1* expression and cross-regulatory interactions between *Id1* and *Id4*. The maintenance of *Id4* expression in RGLs lacking BMP-*Smad4* signaling suggests that another signaling pathway regulates *Id4* in these cells. TGF $\beta$  signaling activity in embryonic midbrain progenitors is mediated in a redundant manner by *Smad4* and the transcriptional co-regulator *Trim33* (Falk et al., 2014). Whether *Trim33* is also required to induce *Id4* in hippocampal RGLs downstream of BMP or whether another niche signal contributes to *Id4* regulation, remains to be determined. Nevertheless, the reduction of *Id1* expression from RGLs in *Smad4cKO* mice indicates that *Id4* diverges from other *Id* proteins not only in its activity but also in the regulation of its expression. *Id4* has been shown to be directly

regulated by Notch signalling in embryonic neural progenitors (Li et al., 2012) and in adult hippocampal stem cells (Zhang et al., 2018) but we find that Id4 expression is only slightly downregulated in RGLs lacking the essential Notch signaling effector RBPJk. The downregulation of Id4 in adult hippocampal stem cells lacking the Notch2 receptor is however observed only transiently at 2 days after Notch2 deletion and not 19 days later (Zhang et al., 2018) , consistent with the idea that other niche-induced pathways can compensate for the lack of Notch signaling and activate Id4 expression. Id4 expression is only mildly affected in RGLs lacking both Smad4 and RBPJk, indicating that additional pathways beside BMP-Smad4 and Notch-Rbpjk promote RGL quiescence by maintaining Id4 expression.

Id4 is expressed in most quiescent RGLs but it is sharply downregulated in active RGLs. Indeed, it is one of the most differentially expressed genes in quiescent versus active stem cells, both in vivo and in NSC cultures (Shin et al., 2015). Down-regulation of Id4 is likely to be crucial for RGLs to leave the quiescent state and become active, and our results suggest that multiple pathways converge on the regulation of Id4 expression, emphasising the importance of this gene in the maintenance of RGL quiescence.

## STAR\*METHODS

| REAGENT or RESOURCE                    | SOURCE                      | IDENTIFIER        |
|----------------------------------------|-----------------------------|-------------------|
| <b>Antibodies</b>                      |                             |                   |
| Rabbit polyclonal anti-Actin           | Sigma-Aldrich               | Cat# A2066        |
| Mouse monoclonal anti-Ascl1            | BD Pharmingen               | Cat# 556604       |
| Rabbit monoclonal anti-Ccnd1           | ThermoScientific            | Cat# RM-9104      |
| Mouse monoclonal anti-E47 ((E2A (Yae)) | Santa Cruz<br>Biotechnology | Cat# sc-416X      |
| Rat monoclonal anti-GFAP               | Invitrogen                  | Cat# 13-0300      |
| Chicken polyclonal anti-GFP            | Abcam                       | Cat# ab13970      |
| Rabbit polyclonal anti-GFP             | Life Technologies           | Cat# A11122       |
| Rabbit monoclonal anti-Id1             | Biocheck                    | Cat# BCH-1/#37-2  |
| Rabbit monoclonal anti-Id2             | Biocheck                    | Cat# BCH-3/#9-2-8 |
| Rabbit monoclonal anti-Id3             | Biocheck                    | Cat# BCH-4/#17-3  |

|                                                                                      |                                      |                     |
|--------------------------------------------------------------------------------------|--------------------------------------|---------------------|
| Rabbit monoclonal anti-Id4                                                           | Biocheck                             | Cat# BCH-9/#82-12   |
| Mouse monoclonal anti-Ki67                                                           | BD Biosciences                       | Cat# 550609         |
| Goat polyclonal anti-tdTomato                                                        | Sicgen                               | Cat# AB8181-200     |
| Rabbit polyclonal anti-Tuj1                                                          | BioLegend<br>(previously<br>Covance) | Cat# PRB-435P-100   |
| Mouse monoclonal anti-V5                                                             | ThermoFisher<br>Scientific           | Cat# R960-25        |
| Alexa Fluor® 488 AffiniPure Donkey Anti-Chicken IgY (IgG) (H+L)                      | Jackson                              | Cat# 703-545-155    |
| Alexa Fluor® 488 AffiniPure F(ab') <sub>2</sub> Fragment Donkey Anti-Mouse IgG (H+L) | Jackson                              | Cat# 715-546-151    |
| Alexa Fluor® 488 AffiniPure F(ab') <sub>2</sub> Fragment Donkey Anti-Rat IgG (H+L)   | Jackson                              | Cat# 712-546-150    |
| Cy™3 AffiniPure F(ab') <sub>2</sub> Fragment Donkey Anti-Rabbit IgG (H+L)            | Jackson                              | Cat# 711-166-152    |
| Cy™3 AffiniPure F(ab') <sub>2</sub> Fragment Donkey Anti-Mouse IgG (H+L)             | Jackson                              | Cat# 715-166-151    |
| Alexa Fluor® 647 AffiniPure F(ab') <sub>2</sub> Fragment Donkey Anti-Rat IgG (H+L)   | Jackson                              | Cat# 712-606-153    |
| Alexa Fluor® 647 AffiniPure Donkey Anti-Goat IgG (H+L)                               | Jackson                              | Cat# 705-605-147    |
| Alexa Fluor® 647 AffiniPure F(ab') <sub>2</sub> Fragment Donkey Anti-Mouse IgG (H+L) | Jackson                              | Cat# 715-606-151    |
| Polyclonal Rabbit Anti-Mouse Immunoglobulins/HRP                                     | Dako                                 | Cat# P0161          |
| Polyclonal Goat Anti-Rabbit Immunoglobulins/HRP                                      | Dako                                 | Cat# P0448          |
| RNAscope® Probe Mm-Ascl1-C2                                                          | ACD (Bio-Techne)                     | Cat# 313291-C2      |
| RNAscope® Probe Mm-Mki67-C1                                                          | ACD (Bio-Techne)                     | Cat# 416771         |
| TSA® Plus fluorescein                                                                | Perkin Elmer                         | Cat# PN NEL741001KT |
| TSA® Plus Cyanine 3                                                                  | Perkin Elmer                         | Cat# PN NEL744001KT |
| <b>Critical Commercial Assays</b>                                                    |                                      |                     |
| RNeasy® Mini Kit                                                                     | Qiagen                               | Cat# 74104          |
| Direct-zol™RNA MiniPrep                                                              | Zymo Research                        | Cat# R2052          |

|                                                                  |                          |                  |
|------------------------------------------------------------------|--------------------------|------------------|
| High Capacity cDNA Reverse Transcription Kit                     | Applied Biosystems       | Cat# 4387406     |
| Click-iT® EdU Alexa Fluor 647 Imaging Kit                        | Invitrogen               | Cat# C10340      |
| Amasa mouse neural stem cell nucleofector kit                    | Lonza                    | Cat#VPG-1004     |
| RNAscope® Multiplex Fluorescent Reagent Kit V2                   | ACD Bio-Techne           | Cat# 323110      |
| TaqMan™ Gene Expression MasterMix                                | Applied Biosystems       | Cat# 4369016     |
| <b>Chemicals, Peptides, and Recombinant Proteins</b>             |                          |                  |
| Recombinant Mouse BMP-4                                          | R&D Systems              | Cat# 5020-BP-010 |
| FGF2                                                             | Peptotech                | Cat# 450-33      |
| Laminin                                                          | Sigma                    | Cat# L2020       |
| Heparin                                                          | Sigma                    | Cat# H3393-50KU  |
| DMEM/F-12 + Glutamax                                             | Invitrogen               | Cat# 31331-093   |
| N2 supplement                                                    | R&D Systems              | Cat# AR009       |
| Lysis Buffer                                                     | ThermoFischer Scientific | Cat# 87788       |
| Protease inhibitor cocktail                                      | ThermoFischer Scientific | Cat# 87786       |
| EDTA                                                             | ThermoFischer Scientific | Cat# 87788       |
| Phosphatase inhibitor cocktail                                   | ThermoFischer Scientific | Cat# 78420       |
| Laemml sample buffer                                             | Sigma                    | Cat# S3401-10VL  |
| Protein G Sepharose                                              | Sigma                    | Cat# P3296       |
| ECL Western Blotting Reagents                                    | Sigma                    | Cat# GERPN2106   |
| MG-132(R)                                                        | Sigma                    | Cat# SML1135-5MG |
| 4-hydroxytamoxifen                                               | Sigma                    | Cat# H6278-50MG  |
| <b>Deposited Data</b>                                            |                          |                  |
| RNAseq raw and differential expression data                      | This paper               | GEO: GSE116997   |
| <b>Experimental Models: Cell Lines</b>                           |                          |                  |
| Mouse: adult hippocampal WT neural stem cell line #5             | This paper               | n/a              |
| Mouse: adult hippocampal <i>Ascl1Venus</i> neural stem cell line | This paper               | n/a              |
| Mouse: adult hippocampal <i>Ascl1KiGFP</i> neural stem cell line | This paper               | n/a              |



|                                                                                                        |                                         |               |
|--------------------------------------------------------------------------------------------------------|-----------------------------------------|---------------|
| Mouse: adult hippocampal <i>Huwe1</i> flx<br>( <i>Huwe1</i> <sup>tm1Alas</sup> ) neural stem cell line | This paper                              | n/a           |
| <b>Experimental Models: Organisms/Strains</b>                                                          |                                         |               |
| Mouse: <i>Slc1a3</i> <sup>tm1cre/ERT2</sup> <i>Mgoe</i> (Glast-CreERT2)                                | Mori et al., 2006                       | n/a           |
| Mouse: <i>Smad4</i> <sup>tm1Rob</sup> ( <i>Smad4</i> flx)                                              | Chu et al., 2004                        | n/a           |
| Mouse: <i>Rbpj</i> <sup>tm1Hon</sup> ( <i>RBPJ</i> kflx)                                               | Han et al., 2002                        | n/a           |
| Mouse: Gt(ROSA)26Sor <sup>tm1[EYFP]Cos</sup> (RYFP)                                                    | Srinivas et al.,<br>2001                | n/a           |
| Mouse: Gt(ROSA)26Sor <sup>tm9[CA-G-tdTomato]Hze</sup><br>(tdTomato)                                    | Madisen et al.,<br>2010                 | n/a           |
| Mouse: <i>Ascl1</i> <sup>tg1[venus]Rik</sup> ( <i>Ascl1</i> Venus)                                     | Imayoshi et al.,<br>2015                | n/a           |
| Mouse: <i>Ascl1</i> <sup>tm1Reed</sup> ( <i>Ascl1</i> KiGFP)                                           | Leung et al., 2007                      | n/a           |
| Mouse: <i>Id4</i> flox                                                                                 | Best et al., 2014                       | n/a           |
| Mouse: Glast-CreERT2; <i>Id4</i> flx;RYFP                                                              | E. Huillard                             | n/a           |
| Mouse: Glast-CreERT2; <i>Smad4</i> flx;RYFP                                                            | This paper                              | n/a           |
| Mouse: Glast-CreERT2; <i>RBPJ</i> kflx;RYFP                                                            | This paper;<br>Andersen et al.,<br>2014 | n/a           |
| Mouse: Glast-CreERT2; <i>Smad4</i> flx; <i>RBPJ</i> kflx;RYFP                                          | This paper                              | n/a           |
| Mouse: Glast-CreERT2;tdTomato                                                                          | This paper                              | n/a           |
| <b>Oligonucleotides</b>                                                                                |                                         |               |
| ACTB QPCR probe                                                                                        | Applied<br>Biosystems                   | Cat# 4352933E |
| Mm03058063_m1 <i>Ascl1</i>                                                                             | Applied<br>Biosystems                   | Cat# 4331182  |
| Mm01279269_m1 <i>Dll1</i>                                                                              | Applied<br>Biosystems                   | Cat# 4331182  |
| GAPDH QPCR probe                                                                                       | Applied<br>Biosystems                   | Cat# 4352932E |
| Mm00775963_g1 <i>Id1</i>                                                                               | Applied<br>Biosystems                   | Cat# 4331182  |
| Mm00711781_m1 <i>Id2</i>                                                                               | Applied<br>Biosystems                   | Cat# 4331182  |
| Mm00492575_m1 <i>Id3</i>                                                                               | Applied<br>Biosystems                   | Cat# 4331182  |

|                                                                |                               |                                                                                                                                               |
|----------------------------------------------------------------|-------------------------------|-----------------------------------------------------------------------------------------------------------------------------------------------|
| Mm00499701_m1 ld4                                              | Applied Biosystems            | Cat# 4331182                                                                                                                                  |
| <b>Recombinant DNA</b>                                         |                               |                                                                                                                                               |
| pCbeta-ld4-FLAG                                                | Rahme, GJ., Israel, MA., 2015 | n/a                                                                                                                                           |
| pCAGGS-E47-IRES-GFP                                            | This paper                    | n/a                                                                                                                                           |
| pCAGGS-IRES-GFP                                                | This paper                    | n/a                                                                                                                                           |
| pmaxGFP Vector (Amaya mouse neural stem cell nucleofector kit) | Lonza                         | Cat# VPG-1004                                                                                                                                 |
| <b>Software and Algorithms</b>                                 |                               |                                                                                                                                               |
| Fiji v1.0                                                      | Schindelin et al., 2012       | <a href="https://fiji.sc">https://fiji.sc</a>                                                                                                 |
| GraphPad Prism 7                                               | GraphPad Software             | <a href="https://www.graphpad.com/scientific-software/prism/">https://www.graphpad.com/scientific-software/prism/</a>                         |
| DAVID Bioinformatics Resource v6.8                             | Huang et al., 2009            | <a href="https://david.ncifcrf.gov">https://david.ncifcrf.gov</a>                                                                             |
| FastQC                                                         | Andrews., 2010                | <a href="https://www.bioinformatics.babraham.ac.uk/projects/fastqc/">https://www.bioinformatics.babraham.ac.uk/projects/fastqc/</a>           |
| Trimmomatic                                                    | Bolger et al., 2014           | <a href="https://github.com/timflutre/trimmomatic">https://github.com/timflutre/trimmomatic</a>                                               |
| tophat2                                                        | Kim, D., et al., 2013         | <a href="https://ccb.jhu.edu/software/tophat">https://ccb.jhu.edu/software/tophat</a>                                                         |
| bowtie2                                                        | Langmead et al., 2012         | <a href="http://bowtie-bio.sourceforge.net/bowtie2/index.shtml">http://bowtie-bio.sourceforge.net/bowtie2/index.shtml</a>                     |
| Cufflinks                                                      | Trapnell et al., 2010         | <a href="http://cole-trapnell-lab.github.io/cufflinks/">http://cole-trapnell-lab.github.io/cufflinks/</a>                                     |
| Cuffdiff                                                       | Trapnell et al., 2013         | <a href="http://cole-trapnell-lab.github.io/cufflinks/cuffdiff/">http://cole-trapnell-lab.github.io/cufflinks/cuffdiff/</a>                   |
| HTSeq                                                          | Anders et al., 2015           | <a href="https://htseq.readthedocs.io/en/release_0.10.0/">https://htseq.readthedocs.io/en/release_0.10.0/</a>                                 |
| EDASeq                                                         | Risso et al., 2011            | <a href="https://bioconductor.org/packages/release/bioc/html/EDASeq.html">https://bioconductor.org/packages/release/bioc/html/EDASeq.html</a> |
| RUVseq                                                         | Risso et al., 2014            | <a href="https://bioconductor.org/packages/release/bioc/html/RUVSeq.html">https://bioconductor.org/packages/release/bioc/html/RUVSeq.html</a> |
| edgeR                                                          | Robinson et al., 2010         | <a href="https://bioconductor.org/packages/release/bioc/html/edgeR.html">https://bioconductor.org/packages/release/bioc/html/edgeR.html</a>   |

Contact for reagent and resource sharing

Francois.guillemot@crick.ac.uk

## Experimental model and subject details

### Mouse models

All procedures involving animals and their care were performed in accordance with the guidelines of the Francis Crick Institute, national guidelines and laws. This study was approved by the Animal Ethics Committee and by the UK Home Office (PPL PB04755CC). Mice were housed in standard cages under a 12h light/dark cycle, with ad libitum access to food and water.

All experimental mice were of a mixed genetic background. Founder mice were bred to MF1 mice, and then backcrossed to littermates of the F1 generation. In order to generate mice with a hippocampal stem cell-specific, tamoxifen-inducible recombination, plus a YFP reporter of recombination, GLAST-CreERT2 ( $Slc1a3^{tm1(cre/ERT2)Mgoe}$ ) (Mori et al., 2006) mice were crossed with Rosa26-floxed-stop-YFP (RYFP;  $Gt(ROSA)26Sor^{tm1(EYFP)Cos}$ ) (Srinivas et al., 2001) mice. These mice were then crossed with our experimental strains:

$Smad4^{flx}$  ( $Smad4^{tm1Rob}$ ) mice, originally reported by (Chu et al., 2004).

$RBPJk^{flx}$  ( $Rbpj^{tm1Hon}$ ) mice, originally reported by (Han et al., 2002).

$Ascl1^{Venus}$  ( $Ascl1^{tg1(venus)Rik}$ ) mice, originally reported by (Imayoshi et al., 2013).

$Ascl1^{KiGFP}$  ( $Ascl1^{tm1Reed}$ ) mice, originally reported by (Leung et al., 2007).

$Id4^{flx}$  mice, originally reported by (Best et al., 2014).

$Glast-CreERT2$  mice were crossed with  $Gt(ROSA)26Sor^{tm9(CAG-tdTomato)Hze}$  (tdTomato), originally reported by (Madisen et al., 2010).

$Glast-CreERT2;Smad4^{flx};RYFP$  mice were crossed with  $Glast-CreERT2;RBPJk;RYFP$  mice in order to generate the quadruple transgenic  $Glast-CreERT2;Smad4^{flx};RBPJk^{flx};RYFP$  line.

Both male and female mice were used for all *in vivo* genetic studies. Experimental groups were a mix of animals from different litters for each particular strain. All mice were injected with tamoxifen at postnatal day 60 +/- 2, and brain tissue collected by transcardial perfusion at 2, 5, 10 or 30 days after the first injection.

## Primary Cell Cultures

For the derivation of adult hippocampal stem cell lines, 7-8 week old mice were sacrificed and the dentate gyrus dissected (previously described by Walker et al., 2013). Cultures were amplified as neurospheres for two passages before dissociation to adherent cultures. Cells were propagated in basal media (DMEM/F-12 + Glutamax (Invitrogen 31331-093) + 1x Neurocult Supplement (Stem Cell Technologies, 05701) + 1x Penicillin-Streptomycin (ThermoFischer Scientific, 15140)+ 2µg/ml Laminin (Sigma, L2020) + 20 ng/ml FGF (Peprotech, 450-33) + 5µg/mL Heparin (Sigma, H3393-50KU). Cells were incubated at 37°C, 5% CO<sub>2</sub>.

The control adult hippocampal neural stem cell line (AHNSC line #5) was derived from a single male WT/RFP mouse. AHNSC *Ascl1*<sup>Venus</sup> cell line was derived from a single male *Ascl1*<sup>wt/Venus</sup> mouse. *Huwe1* is X-linked, therefore AHNSC *Huwe1*<sup>flx</sup> cell line was derived from a male *Glast-CreERT2*<sup>wt/wt</sup>; *Huwe1*<sup>fl/Y</sup>; *Rosa*<sup>YFP/YFP</sup> mouse.

## Method Details

### Tamoxifen administration

To induce activation of *CreERT2* recombinase, 2mg (57-67mg/Kg) of 4-hydroxytamoxifen (Sigma, H6278) was administered intraperitoneally (ip) to mice at postnatal day 60 (P60), at the same time each day for 5 consecutive days. For in situ hybridization experiments, *Glast-CreERT2*; *tdTomato* (Ai9) mice received a single injection at postnatal day 60 +/- 2, and brain tissue collected by transcardial perfusion 48h later.

### Tissue preparation and immunofluorescence

Mice were transcardially perfused with phosphate-buffered saline (PBS) for 3mins, followed by 4% paraformaldehyde (PFA) in PBS for 12mins. Brains were post-fixed for 2hours in 4% PFA at 4°C and washed with PBS. Brains were coronally sectioned at a thickness of 40µm using a vibratome (Leica).

For in situ samples, mice were perfused with PBS for 3mins, followed by 10% neutral buffered formalin (NBF) for 12mins. Brains were post-fixed in 10% NBF at room temperature for 16-32h, and then washed with 70% EtOH. Brains were paraffin embedded, and coronally sectioned at a thickness of 5 $\mu$ m.

Cultured cells were fixed with 4%PFA in PBS for 10mins at room temperature, and washed with PBS.

For immunofluorescence of tissue, samples were blocked with 10% normal donkey serum (NDS) in 1%Triton-PBS for 2hrs at room temperature with rocking. Fixed cells were blocked with 10%NDS in 0.1%Triton-PBS for 1hr at room temperature. Primary antibodies were diluted in 10%NDS in 0.1%Triton-PBS, and incubated with samples overnight at 4°C with rocking. Following 3x 0.1%Triton-PBS washes, samples were incubated with secondary antibodies diluted in 10%NDS in 0.1%Triton-PBS for 2hrs at room temperature with rocking. Following 3x 0.1%Triton-PBS washes, samples were incubated with DAPI 1:10,000 in 1:1 PBS:H<sub>2</sub>O for 30mins at room temperature with rocking. Primary and secondary antibodies are listed in Key Resources Table, dilutions listed in Table S1.

EdU was detected following secondary antibody incubation, using Click-iT® EdU Alexa Fluor 647 Imaging Kit (Invitrogen, C10340), following manufacturer's instructions.

#### RNA *in situ* hybridization

For RNA *in situ* hybridization, the RNAscope® Multiplex Fluorescent Reagent Kit V2 (ACD Bio-Techne, 323110) was used with NBF fixed-paraffin embedded 5 $\mu$ m sections, and stained according to the standard company protocol. Target retrieval was performed for 15mins, and Protease Plus treatment was carried out for 30mins. For dual RNAscope®-immunofluorescence, following the development of HRP-C3 signal and wash steps, slides were washed in distilled H<sub>2</sub>O, and washed 3x 5mins in 0.1%Triton-PBS at room temperature. Slides were then processed for immunofluorescence as described above. Probes and fluorophores are listed in Key Resources Table, dilutions listed in Table S1.

## Microscopic analysis

All images were acquired using an SP5 confocal microscope (Leica). For cell culture immunofluorescence, 3 random regions of each coverslip were imaged with a z-step of 1 $\mu$ m. For adult tissue immunofluorescence, both left and right dentate gyri of every twelfth 40 $\mu$ m section along the rostrocaudal length of the DG were imaged, with a z-step of 1 $\mu$ m through the whole 40 $\mu$ m section. For quantification of %+ RGLs, at least 200 RGLs in each of at least 3 mice for each genotype were quantified.

RGLs were identified based on their characteristic morphology (nucleus in the subgranular zone, radial process projecting through the molecular layer) and positive labelling with GFAP and GFP in the case of *Glast-CreERT2;RYFP* recombined cells, or tdTomato positivity in the case of *Glast-CreERT2;tdTomato* recombined cells.

## Cell treatments, constructs and transfection

For culturing adult hippocampal NSCs in proliferation conditions, cells were grown in basal media (DMEM/F-12 + Glutamax (Invitrogen, 31331-093)) + 1x N2 supplement (R&D Systems, AR009) + 1x Penicillin-Streptomycin (ThermoFischer Scientific, 15140) + 2 $\mu$ g/ml Laminin (Sigma, L2020) + 5 $\mu$ g/mL Heparin + 20 ng/ml FGF2 (Peprotech, 450-33). To induce quiescence, cells were plated into flasks or onto coverslips in proliferation conditions and allowed to adhere overnight. Media was replaced the next day with basal media or basal media plus 20ng/mL recombinant mouse BMP4 (R&D Systems, 5020-BP), and cultured for 72h at 37°C, 5% CO<sub>2</sub>.

To test that BMP4-induced cells could reactivate and differentiate, BMP4-treated cells were detached from their flask using Accutase (Sigma, A6964) and re-plated into proliferation conditions, and fixed at 24h, 48h and 72h post-reactivation. To differentiate the cells, following 72h reactivation, cells were cultured in the presence of 10ng/mL FGF2 and 2% foetal bovine serum, for 72h.

In order to visualise S-phase, EdU (Invitrogen, C10340) was added to the media of cells in culture 1hr prior to fixation.

To inhibit the proteasome, cells were grown on 10cm diameter dishes for 72h in supplemented basal media with either just 20ng/mL FGF2 or FGF2 + 20ng/mL BMP4. Cells were treated with either 10 $\mu$ M MG132 (Sigma, SML1135) or an equal volume of DMSO (Sigma), for 30, 60 or 120mins.

For overexpression of Id4 and E47 in NSCs, 5x10<sup>6</sup> cells per construct were nucleofected using the Amaxa mouse neural stem cell nucleofector kit (Lonza, VPG-1004) and Amaxa Nucleofector II (Lonza), using the program A-033, according to manufacturer's instructions. The pCbeta-Id4-FLAG construct was a kind gift from M. Israel (Rahme et al., 2015). The E47 expression construct was generated by cloning E47 into pCAGGS-IRES-GFP via EcoRV/Xho1. In order to FACS sort Id4-transfected cells, cells were co-transfected with an empty pCAGGS-IRES-GFP construct at half the concentration of pCbeta-Id4-FLAG, to increase the likelihood of GFP+ cells also being Id4+. For FACS and subsequent RNAseq analysis, FGF2 and FGF2+BMP4 control samples were nucleofected with pMaxGFP vector from the Amaxa kit (Lonza, VPG-1004). Following transfection, cells were plated into flasks and onto glass coverslips, in supplemented basal media, and incubated for 48h at 37°C, 5% CO<sub>2</sub>. Cells transfected with Id4 were cultured in the presence of 20ng/mL FGF2; cells transfected with E47 were cultured in the presence of both 20ng/mL FGF2 and 20ng/mL BMP4.

#### FAC sorting

FACS tubes were pre-coated with 5%BSA-PBS at 37°C for at least 30mins prior to sorting. Cells were detached from flasks using Accutase (Sigma) and centrifuged at 0.3RCF for 5mins. Cell pellets were resuspended in 750 $\mu$ L recovery media (5%BSA-PBS + 20 ng/ml FGF + 1 $\mu$ g/mL Heparin). 1 $\mu$ L propidium iodide was added to cell suspensions to check for cell viability. Cells were sorted on a FACS Aria III machine, into recovery media. Both GFP positive and negative cells were recovered into separate tubes.

#### RNA extraction, cDNA synthesis and QPCR

For FACS experiments, cells were lysed using Qiagen lysis buffer. For all other experiments, cells were lysed with Trizol reagent. RNA was extracted using RNeasy® Mini Kit (Qiagen, 74104) or Direct-zol™ RNA MiniPrep Kit (Zymo Research, R2052), according to manufacturer's instructions.

cDNA was synthesised using the High Capacity cDNA Reverse Transcription Kit (Applied Biosystems, 4387406) following manufacturer's instructions. Gene expression level was measured using TaqMan Gene expression assays (Applied Biosystems) and quantitative real-time PCR carried out on a QuantStudio Real-Time PCR system (ThermoFisher). Gene expression was calculated relative to endogenous controls Gapdh and ActinB, and normalised to the expression of the control sample in each group, to give a ddCt value.

#### RNA sequencing and analysis

RNA concentration was quantified using the Qubit dsDNA BR/HS Assay Kit. A KAPA mRNA HyperPrep Kit (for Illumina) (KAPA Biosystems, Wilmington, MA, USA) was used with 1000ng of RNA diluted to a final volume of 50µl. Each RNA sample was captured with 50µl of capture beads at 65°C for 2 min and 20°C for 5 min. For the second capture, 50µl of RNase free water was used at 70°C for 2 min and 20°C for 5 min. Captured RNA was subjected to the KAPA Hyper Prep assay: end-repair, A-tailing, and ligation by adding 11µl of Fragment, Prime and Elite Buffer (2X). To obtain a distribution of 200-300bp fragment on the library, the reaction was run for 6 min at 94°C. cDNA synthesis was run in 2 steps following manufacturer's instructions. The ligation step consisted of a final volume of 110 µL of the adaptor ligation reaction mixture with 60µL of input cDNA, 5 µL of diluted adaptor and 45µL of ligation mix (50µL of ligation buffer+ 10 µL of DNA ligase). The Kapa Dual-Indexed Adapters (KAPA Biosystems-KK8720) stock was diluted to 7µM (1.5mM or 7nM) to get the best adaptor concentration for library construction. The ligation cycle was run according to manufacturer's instructions. To remove short fragments such as adapter dimers, 2 AMPure XP bead clean-ups were done (0.63 SPRI and 0.7SPRI). To amplify the library, 7 PCR cycles were applied to cDNA KAPA HP mix. Amplified libraries were purified using AMPure XP. The quality and fragment size distributions of the purified libraries was assessed by a 2200 TapeStation Instrument (Agilent Technologies, Santa Clara, CA, USA).



Libraries were sequenced with Hiseq4000 (Illumina), 50-bp paired-end reads for sequencing proliferating vs quiescent NSCs; 75bp single-end reads for Id4/E47 overexpressing NSCs, with a depth of  $30 \times 10^6$  reads.

The quality of RNA sequence reads was evaluated using FastQC (version 0.11.2)(Andrews, 2010). Low quality reads and contaminants (e.g. sequence adapters) were removed using Trimmomatic (version 0.32) (Bolger et al., 2014). Sequences that passed the quality assessment were aligned to the mm10 genome using tophat2 (version 2.0.14) (Kim et al., 2013), with bowtie2 (version 2.1.0) (Langmead and Salzberg, 2012) or for the quiescent NSC RNAseq data set, Cufflinks (Trapnell et al., 2010). Transcript abundance level (transcript count) was generated using HTSeq (version 0.5.3p9) (Anders et al., 2015). The transcript counts were further processed using R software environment for statistical computing and graphics (version 3.4.0). Data normalization, removal of batch effect and other variant was performed using EDASeq R package [(Risso et al., 2011) and RUVseq package (Remove Unwanted Variation from RNA-Seq package) (Risso et al., 2014). Differential expression was performed using edgeR R package (Robinson et al., 2010), using the negative binomial GLM approach, or for the quiescent NSC RNAseq data set, Cuffdiff (version 7) (Trapnell et al., 2013). Differentially expressed genes with false discovery rate (FDR  $\leq 0.05$ , Benjamini-Hochberg multiple testing correction), expression level in control samples  $> 1$  CPM (counts per million) or  $> 1$  FPKM (fragments per kilobase of transcript per million mapped reads) for the quiescent NSC RNAseq data set, and log fold change  $> 1$  were retained and used for further processing, gene ontology and pathway analysis.

#### Protein purification, Western Blot and Co-immunoprecipitation

WT and Ascl1-Venus NSCs were cultured in 10cm diameter dishes, in either proliferation or quiescent conditions for 72h. Media was refreshed after 40h to ensure constant BMP signalling. Cells were then washed with ice-cold PBS, and scraped in Lysis Buffer (ThermoFischer Scientific, 87788) + 1x Protease inhibitor cocktail (ThermoFischer Scientific, 87786) + 1 x EDTA (ThermoFischer Scientific, 87788) + 1x Phosphatase inhibitor cocktail (ThermoFischer Scientific, 78420). Cells were lysed at 4°C for 20min under rotation and then centrifuged at 13,000 RPM at 4°C for 20mins and the pellet discarded. The supernatant was analysed either by western blot or subject to immunoprecipitation.

For western blot analysis, the supernatant was mixed with 1x Laemmli sample buffer (Sigma, S3401-10VL) and incubated at 95°C for 5 mins.

For immunoprecipitation experiments, antibodies were added to cell lysate supernatants and incubated at 4°C for 2 hours under rotation. As controls, mouse anti-V5-tag or rabbit anti-HA-tag antibodies were used under the same conditions. Sepharose coupled to protein G (Sigma, P3296) was blocked with 5% BSA-PBS for 2 hours at 4°C under rotation. After several washes with PBS, it was then added to the lysate-antibody suspension and incubated for 2 hours at 4°C under rotation. After this period, Sepharose beads were washed with lysis buffer 5 times, then suspended in an equal volume of Laemmli sample buffer and incubated at 95°C for 5 mins.

Samples were run in polyacrylamide gel at 120V, after which they were transferred onto a nitrocellulose membrane. Filters were then saturated with 5% BSA in TBS-Tween or 5% milk TBS-Tween and incubated with the antibodies. Detection was performed using ECL Western Blotting Reagents (Sigma, GERPN2106).

### Quantification and Statistical Analysis

To measure immunofluorescence intensity, the nucleus of each identified RGL was manually outlined based on DAPI staining, and the average pixel value of the channel of interest was measured using FIJI software. Every value was normalised to the background level measured in a negative nucleus in the same z-plane as each RGL. At least 200 RGLs in each of at least 3 mice were quantified for each protein. For *in vitro* IHC quantification, average pixel intensity for each channel was measured for the area of each nuclei, using FIJI software. For each experiment, at least 100 cells were quantified across at least 3 biological replicates. To generate the arbitrary units (A.U.) for both *in vivo* and *in vitro* IHC, all the values within a sample were made relative to the average of the control, and multiplied by 100. For quantification of RNAscope® staining, the number of 'dots' in each identified RGL nucleus were counted for each probe. In addition, the average pixel intensity in and around each RGL nucleus was measured for each probe, using FIJI. 100 RGLs were quantified across 5 mice. For analysis of Id4 and E47 nucleofected cells, Id4+ or GFP+(E47) cells were identified by immunostaining for Id4 or GFP respectively, and positive cells compared to

negative, non-transfected cells within the same coverslip. Cell counts were done from at least 3 coverslips from 3 biological replicates.

For quantification of WB and IP assays, films were scanned and, if appropriate, subjected to band densitometry and quantification using Image J software. Each band value was normalised according to the background of the filter and its loading control.

Statistical analyses were conducted using a two-sample unpaired t test assuming Gaussian distribution using Prism software. All error bars represent the mean  $\pm$  SEM. Significance is stated as follows:  $p > 0.05$  (ns),  $p < 0.05$  (\*),  $p < 0.01$  (\*\*),  $p < 0.001$  (\*\*\*),  $p < 0.0001$  (\*\*\*\*). Statistical details of each experiment can be found in the figure legend. n represents number of independent biological repeats.

#### Data and Software Availability

The accession number for the RNA sequencing data reported in this paper is GEO: GSE116997. If you would like access to this data, please contact the corresponding authors.

#### **AUTHOR CONTRIBUTIONS**

The study was conceived and the manuscript was written by I.B., F.G and N.U. Most of the work was performed by I.B.; B.R. and E.H. provided the Id4 cKO mice and were involved in discussions of the results, M.d.M.M. performed the immunoprecipitations and western blot analyses and E.M., S.V. and D.v.d.B. analysed the RNA-Seq data.

#### **ACKNOWLEDGMENTS**

We gratefully acknowledge Lan Chen for technical support, Rekha Subramaniam and Nicholas Chisholm for managing the mouse colony, the Advanced Sequencing Facility, Bioinformatics and Biostatistics Facility, Experimental Histopathology Facility and Flow Cytometry Facility of the Francis Crick Institute for their help and support, Jane Johnson, Ryoichiro Kageyama, Ana Lasorella, Randall Reed, Jane Visvader for providing mice, Gilbert Rahme, Matthew Havrda and Mark Israel for plasmids, Runrui Zhang and Verdon Taylor for sharing data and manuscript before publication and members of the Guillemot lab for discussions. N.U. was supported by a fellowship from the Francis Crick Institute and is currently supported by the Austrian Academy of Science; B.R. was supported by H2020-

MSCA-IF-2014; D.v.d.B. was supported by a Marie Curie Fellowship, project 799214; E.H. was supported by Ligue Nationale contre le Cancer, Fondation ARC pour la recherche sur le cancer (PJA 20131200481, PJA 20151203259) and FP7 Marie Curie CIG. This work was supported by the Francis Crick Institute, which receives its funding from Cancer Research UK (FC0010089), the UK Medical Research Council (FC0010089) and the Wellcome Trust (FC0010089), by the UK Medical Research Council (project grant U117570528 to F.G.) and by the Wellcome Trust (Investigator Award 106187/Z/14/Z to F.G.). The authors declare no conflict of interest. Supplement contains additional data.

## REFERENCES

- Agudo, J., Park, E.S., Rose, S.A., Alibo, E., Sweeney, R., Dhainaut, M., Kobayashi, K.S., Sachidanandam, R., Baccarini, A., Merad, M., *et al.* (2018). Quiescent Tissue Stem Cells Evade Immune Surveillance. *Immunity* 48, 271-285 e275.
- Anders, S., Pyl, P.T., and Huber, W. (2015). HTSeq--a Python framework to work with high-throughput sequencing data. *Bioinformatics* 31, 166-169.
- Andersen, J., Urban, N., Achimastou, A., Ito, A., Simic, M., Ullom, K., Martynoga, B., Lebel, M., Goritz, C., Frisen, J., *et al.* (2014). A transcriptional mechanism integrating inputs from extracellular signals to activate hippocampal stem cells. *Neuron* 83, 1085-1097.
- Andrews, S. (2010). FastQC: a quality control tool for high throughput sequence data. Babraham Bioinformatics  
[\[https://www.bioinformatics.babraham.ac.uk/projects/fastqc/\]](https://www.bioinformatics.babraham.ac.uk/projects/fastqc/).
- Artegiani, B., Lyubimova, A., Muraro, M., van Es, J.H., van Oudenaarden, A., and Clevers, H. (2017). A Single-Cell RNA Sequencing Study Reveals Cellular and Molecular Dynamics of the Hippocampal Neurogenic Niche. *Cell Rep* 21, 3271-3284.
- Bai, G., Sheng, N., Xie, Z., Bian, W., Yokota, Y., Benezra, R., Kageyama, R., Guillemot, F., and Jing, N. (2007). Id sustains Hes1 expression to inhibit precocious neurogenesis by releasing negative autoregulation of Hes1. *Dev Cell* 13, 283-297.
- Bao, H., Asrican, B., Li, W., Gu, B., Wen, Z., Lim, S.A., Haniff, I., Ramakrishnan, C., Deisseroth, K., Philpot, B., *et al.* (2017). Long-Range GABAergic Inputs Regulate Neural Stem Cell Quiescence and Control Adult Hippocampal Neurogenesis. *Cell Stem Cell* 21, 604-617 e605.

- Bedford, L., Walker, R., Kondo, T., van Cruchten, I., King, E.R., and Sablitzky, F. (2005). Id4 is required for the correct timing of neural differentiation. *Dev Biol* *280*, 386-395.
- Benezra, R., Davis, R.L., Lockshon, D., Turner, D.L., and Weintraub, H. (1990). The protein Id: a negative regulator of helix-loop-helix DNA binding proteins. *Cell* *61*, 49-59.
- Best, S.A., Hutt, K.J., Fu, N.Y., Vaillant, F., Liew, S.H., Hartley, L., Scott, C.L., Lindeman, G.J., and Visvader, J.E. (2014). Dual roles for Id4 in the regulation of estrogen signaling in the mammary gland and ovary. *Development* *141*, 3159-3164.
- Boareto, M., Iber, D., and Taylor, V. (2017). Differential interactions between Notch and ID factors control neurogenesis by modulating Hes factor autoregulation. *Development* *144*, 3465-3474.
- Bolger, A.M., Lohse, M., and Usadel, B. (2014). Trimmomatic: a flexible trimmer for Illumina sequence data. *Bioinformatics* *30*, 2114-2120.
- Bonaguidi, M.A., Peng, C.Y., McGuire, T., Falciglia, G., Gobeske, K.T., Czeisler, C., and Kessler, J.A. (2008). Noggin expands neural stem cells in the adult hippocampus. *J Neurosci* *28*, 9194-9204.
- Bond, A.M., Ming, G.L., and Song, H. (2015). Adult Mammalian Neural Stem Cells and Neurogenesis: Five Decades Later. *Cell Stem Cell* *17*, 385-395.
- Castilho, R.M., Squarize, C.H., Chodosh, L.A., Williams, B.O., and Gutkind, J.S. (2009). mTOR mediates Wnt-induced epidermal stem cell exhaustion and aging. *Cell Stem Cell* *5*, 279-289.
- Castro, D.S., Martynoga, B., Parras, C., Ramesh, V., Pacary, E., Johnston, C., Drechsel, D., Lebel-Potter, M., Garcia, L.G., Hunt, C., *et al.* (2011). A novel function of the proneural factor *Ascl1* in progenitor proliferation identified by genome-wide characterization of its targets. *Genes Dev* *25*, 930-945.
- Choe, Y., Pleasure, S.J., and Mira, H. (2015). Control of Adult Neurogenesis by Short-Range Morphogenic-Signaling Molecules. *Cold Spring Harb Perspect Biol* *8*, a018887.
- Chu, G.C., Dunn, N.R., Anderson, D.C., Oxburgh, L., and Robertson, E.J. (2004). Differential requirements for *Smad4* in TGFbeta-dependent patterning of the early mouse embryo. *Development* *131*, 3501-3512.
- de Morree, A., van Velthoven, C.T.J., Gan, Q., Salvi, J.S., Klein, J.D.D., Akimenko, I., Quarta, M., Biressi, S., and Rando, T.A. (2017). *Staufen1* inhibits MyoD translation to actively maintain muscle stem cell quiescence. *Proc Natl Acad Sci U S A* *114*, E8996-E9005.

- Dumont, N.A., Wang, Y.X., and Rudnicki, M.A. (2015). Intrinsic and extrinsic mechanisms regulating satellite cell function. *Development* *142*, 1572-1581.
- Engler, A., Rolando, C., Giachino, C., Saotome, I., Erni, A., Brien, C., Zhang, R., Zimmer-Strobl, U., Radtke, F., Artavanis-Tsakonas, S., *et al.* (2018). Notch2 Signaling Maintains NSC Quiescence in the Murine Ventricular-Subventricular Zone. *Cell Rep* *22*, 992-1002.
- Falk, S., Joosten, E., Kaartinen, V., and Sommer, L. (2014). Smad4 and Trim33/Tif1gamma redundantly regulate neural stem cells in the developing cortex. *Cereb Cortex* *24*, 2951-2963.
- Garcia-Prat, L., Martinez-Vicente, M., Perdiguero, E., Ortet, L., Rodriguez-Ubreva, J., Rebollo, E., Ruiz-Bonilla, V., Gutarra, S., Ballestar, E., Serrano, A.L., *et al.* (2016). Autophagy maintains stemness by preventing senescence. *Nature* *529*, 37-42.
- Han, H., Tanigaki, K., Yamamoto, N., Kuroda, K., Yoshimoto, M., Nakahata, T., Ikuta, K., and Honjo, T. (2002). Inducible gene knockout of transcription factor recombination signal binding protein-J reveals its essential role in T versus B lineage decision. *Int Immunol* *14*, 637-645.
- Ho, T.T., Warr, M.R., Adelman, E.R., Lansinger, O.M., Flach, J., Verovskaya, E.V., Figueroa, M.E., and Passegue, E. (2017). Autophagy maintains the metabolism and function of young and old stem cells. *Nature* *543*, 205-210.
- Hochgerner, H., Zeisel, A., Lonnerberg, P., and Linnarsson, S. (2018). Conserved properties of dentate gyrus neurogenesis across postnatal development revealed by single-cell RNA sequencing. *Nat Neurosci*.
- Imayoshi, I., Isomura, A., Harima, Y., Kawaguchi, K., Kori, H., Miyachi, H., Fujiwara, T., Ishidate, F., and Kageyama, R. (2013). Oscillatory control of factors determining multipotency and fate in mouse neural progenitors. *Science* *342*, 1203-1208.
- Imayoshi, I., and Kageyama, R. (2014). bHLH factors in self-renewal, multipotency, and fate choice of neural progenitor cells. *Neuron* *82*, 9-23.
- Imayoshi, I., Sakamoto, M., Yamaguchi, M., Mori, K., and Kageyama, R. (2010). Essential roles of Notch signaling in maintenance of neural stem cells in developing and adult brains. *J Neurosci* *30*, 3489-3498.
- Kim, D., Pertea, G., Trapnell, C., Pimentel, H., Kelley, R., and Salzberg, S.L. (2013). TopHat2: accurate alignment of transcriptomes in the presence of insertions, deletions and gene fusions. *Genome Biol* *14*, R36.

- Langmead, B., and Salzberg, S.L. (2012). Fast gapped-read alignment with Bowtie 2. *Nat Methods* *9*, 357-359.
- Leeman, D.S., Hebestreit, K., Ruetz, T., Webb, A.E., McKay, A., Pollina, E.A., Dulken, B.W., Zhao, X., Yeo, R.W., Ho, T.T., *et al.* (2018). Lysosome activation clears aggregates and enhances quiescent neural stem cell activation during aging. *Science* *359*, 1277-1283.
- Leung, C.T., Coulombe, P.A., and Reed, R.R. (2007). Contribution of olfactory neural stem cells to tissue maintenance and regeneration. *Nat Neurosci* *10*, 720-726.
- Li, Y., Hibbs, M.A., Gard, A.L., Shylo, N.A., and Yun, K. (2012). Genome-wide analysis of N1ICD/RBPJ targets in vivo reveals direct transcriptional regulation of Wnt, SHH, and hippo pathway effectors by Notch1. *Stem Cells* *30*, 741-752.
- Lie, D.C., Colamarino, S.A., Song, H.J., Desire, L., Mira, H., Consiglio, A., Lein, E.S., Jessberger, S., Lansford, H., Dearie, A.R., *et al.* (2005). Wnt signalling regulates adult hippocampal neurogenesis. *Nature* *437*, 1370-1375.
- Lim, D.A., and Alvarez-Buylla, A. (2016). The Adult Ventricular-Subventricular Zone (V-SVZ) and Olfactory Bulb (OB) Neurogenesis. *Cold Spring Harb Perspect Biol* *8*.
- Ling, F., Kang, B., and Sun, X.H. (2014). Id proteins: small molecules, mighty regulators. *Curr Top Dev Biol* *110*, 189-216.
- Liu, K.J., and Harland, R.M. (2003). Cloning and characterization of *Xenopus* Id4 reveals differing roles for Id genes. *Dev Biol* *264*, 339-351.
- Llorens-Bobadilla, E., Zhao, S., Baser, A., Saiz-Castro, G., Zwadlo, K., and Martin-Villalba, A. (2015). Single-Cell Transcriptomics Reveals a Population of Dormant Neural Stem Cells that Become Activated upon Brain Injury. *Cell Stem Cell* *17*, 329-340.
- Madisen, L., Zwingman, T.A., Sunkin, S.M., Oh, S.W., Zariwala, H.A., Gu, H., Ng, L.L., Palmiter, R.D., Hawrylycz, M.J., Jones, A.R., *et al.* (2010). A robust and high-throughput Cre reporting and characterization system for the whole mouse brain. *Nat Neurosci* *13*, 133-140.
- Magnusson, J.P., Goritz, C., Tatarishvili, J., Dias, D.O., Smith, E.M., Lindvall, O., Kokaia, Z., and Frisen, J. (2014). A latent neurogenic program in astrocytes regulated by Notch signaling in the mouse. *Science* *346*, 237-241.
- Martynoga, B., Mateo, J.L., Zhou, B., Andersen, J., Achimastou, A., Urban, N., van den Berg, D., Georgopoulou, D., Hadjur, S., Wittbrodt, J., *et al.* (2013). Epigenomic enhancer

- annotation reveals a key role for NFIX in neural stem cell quiescence. *Genes Dev* 27, 1769-1786.
- Mira, H., Andreu, Z., Suh, H., Lie, D.C., Jessberger, S., Consiglio, A., San Emeterio, J., Hortiguera, R., Marques-Torres, M.A., Nakashima, K., *et al.* (2010). Signaling through BMPRII regulates quiescence and long-term activity of neural stem cells in the adult hippocampus. *Cell Stem Cell* 7, 78-89.
- Mori, T., Tanaka, K., Buffo, A., Wurst, W., Kuhn, R., and Gotz, M. (2006). Inducible gene deletion in astroglia and radial glia--a valuable tool for functional and lineage analysis. *Glia* 54, 21-34.
- Nam, H.S., and Benezra, R. (2009). High levels of Id1 expression define B1 type adult neural stem cells. *Cell Stem Cell* 5, 515-526.
- Niola, F., Zhao, X., Singh, D., Castano, A., Sullivan, R., Lauria, M., Nam, H.S., Zhuang, Y., Benezra, R., Di Bernardo, D., *et al.* (2012). Id proteins synchronize stemness and anchorage to the niche of neural stem cells. *Nat Cell Biol* 14, 477-487.
- Patel, D., Morton, D.J., Carey, J., Havrda, M.C., and Chaudhary, J. (2015). Inhibitor of differentiation 4 (ID4): From development to cancer. *Biochim Biophys Acta* 1855, 92-103.
- Petrova, R., Garcia, A.D., and Joyner, A.L. (2013). Titration of GLI3 repressor activity by sonic hedgehog signaling is critical for maintaining multiple adult neural stem cell and astrocyte functions. *J Neurosci* 33, 17490-17505.
- Qu, Q., Sun, G., Li, W., Yang, S., Ye, P., Zhao, C., Yu, R.T., Gage, F.H., Evans, R.M., and Shi, Y. (2010). Orphan nuclear receptor TLX activates Wnt/beta-catenin signalling to stimulate neural stem cell proliferation and self-renewal. *Nat Cell Biol* 12, 31-40; sup pp 31-39.
- Risso, D., Ngai, J., Speed, T.P., and Dudoit, S. (2014). Normalization of RNA-seq data using factor analysis of control genes or samples. *Nat Biotechnol* 32, 896-902.
- Risso, D., Schwartz, K., Sherlock, G., and Dudoit, S. (2011). GC-content normalization for RNA-Seq data. *BMC Bioinformatics* 12, 480.
- Robinson, M.D., McCarthy, D.J., and Smyth, G.K. (2010). edgeR: a Bioconductor package for differential expression analysis of digital gene expression data. *Bioinformatics* 26, 139-140.
- Ruzinova, M.B., and Benezra, R. (2003). Id proteins in development, cell cycle and cancer. *Trends Cell Biol* 13, 410-418.



- Samanta, J., and Kessler, J.A. (2004). Interactions between ID and OLIG proteins mediate the inhibitory effects of BMP4 on oligodendroglial differentiation. *Development* *131*, 4131-4142.
- Sharma, P., Chinaranagari, S., and Chaudhary, J. (2015). Inhibitor of differentiation 4 (ID4) acts as an inhibitor of ID-1, -2 and -3 and promotes basic helix loop helix (bHLH) E47 DNA binding and transcriptional activity. *Biochimie* *112*, 139-150.
- Shin, J., Berg, D.A., Zhu, Y., Shin, J.Y., Song, J., Bonaguidi, M.A., Enikolopov, G., Nauen, D.W., Christian, K.M., Ming, G.L., *et al.* (2015). Single-Cell RNA-Seq with Waterfall Reveals Molecular Cascades underlying Adult Neurogenesis. *Cell Stem Cell* *17*, 360-372.
- Shou, J., Rim, P.C., and Calof, A.L. (1999). BMPs inhibit neurogenesis by a mechanism involving degradation of a transcription factor. *Nat Neurosci* *2*, 339-345.
- Sikder, H.A., Devlin, M.K., Dunlap, S., Ryu, B., and Alani, R.M. (2003). Id proteins in cell growth and tumorigenesis. *Cancer Cell* *3*, 525-530.
- Silva-Vargas, V., Crouch, E.E., and Doetsch, F. (2013). Adult neural stem cells and their niche: a dynamic duo during homeostasis, regeneration, and aging. *Curr Opin Neurobiol* *23*, 935-942.
- Singh, S.K., Singh, S., Gadomski, S., Sun, L., Pfannenstien, A., Magidson, V., Chen, X.F., Kozlov, S., Tessarollo, L., Klarmann, K.D., *et al.* (2018). Id1 ablation protects hematopoietic stem cells from stress-induced exhaustion and aging. *Cell Stem Cell* *In press*.
- Sobrinho, V., Gonzalez-Rodriguez, P., Annese, V., Lopez-Barneo, J., and Pardal, R. (2018). Fast neurogenesis from carotid body quiescent neuroblasts accelerates adaptation to hypoxia. *EMBO Rep* *19*.
- Song, J., Zhong, C., Bonaguidi, M.A., Sun, G.J., Hsu, D., Gu, Y., Meletis, K., Huang, Z.J., Ge, S., Enikolopov, G., *et al.* (2012). Neuronal circuitry mechanism regulating adult quiescent neural stem-cell fate decision. *Nature* *489*, 150-154.
- Srinivas, S., Watanabe, T., Lin, C.S., Williams, C.M., Tanabe, Y., Jessell, T.M., and Costantini, F. (2001). Cre reporter strains produced by targeted insertion of EYFP and ECFP into the ROSA26 locus. *BMC Dev Biol* *1*, 4.
- Sun, Y., Hu, J., Zhou, L., Pollard, S.M., and Smith, A. (2011). Interplay between FGF2 and BMP controls the self-renewal, dormancy and differentiation of rat neural stem cells. *J Cell Sci* *124*, 1867-1877.

- Trapnell, C., Hendrickson, D.G., Sauvageau, M., Goff, L., Rinn, J.L., and Pachter, L. (2013). Differential analysis of gene regulation at transcript resolution with RNA-seq. *Nat Biotechnol* *31*, 46-53.
- Trapnell, C., Williams, B.A., Pertea, G., Mortazavi, A., Kwan, G., van Baren, M.J., Salzberg, S.L., Wold, B.J., and Pachter, L. (2010). Transcript assembly and quantification by RNA-Seq reveals unannotated transcripts and isoform switching during cell differentiation. *Nat Biotechnol* *28*, 511-515.
- Urban, N., van den Berg, D.L., Forget, A., Andersen, J., Demmers, J.A., Hunt, C., Ayrault, O., and Guillemot, F. (2016). Return to quiescence of mouse neural stem cells by degradation of a proactivation protein. *Science* *353*, 292-295.
- Vinals, F., Reiriz, J., Ambrosio, S., Bartrons, R., Rosa, J.L., and Ventura, F. (2004). BMP-2 decreases Mash1 stability by increasing Id1 expression. *EMBO J* *23*, 3527-3537.
- Yun, K., Mantani, A., Garel, S., Rubenstein, J., and Israel, M.A. (2004). Id4 regulates neural progenitor proliferation and differentiation in vivo. *Development* *131*, 5441-5448.
- Zhang, R., Boareto, M., Engler, A., Giachino, C., Iber, D., and Taylor, V. (2018). Notch2 signaling regulates Id4 and cell cycle genes to maintain neural stem cell quiescence in the adult hippocampus. Manuscript submitted.

## FIGURE LEGENDS

### Figure 1. *Ascl1* is transcribed in both quiescent and proliferating hippocampal stem cells

(A) Immunolabeling for GFP, *Ascl1* and GFAP in the subgranular zone (SGZ) of the dentate gyrus (DG) of *Ascl1*<sup>KiGFP</sup> reporter mice. White arrows indicate GFP+*Ascl1*- RGLs; yellow arrows indicate GFP+*Ascl1*+ RGLs. Scale bar, 30µm.

(B) Quantification of the data shown in (A). The widespread GFP expression indicates that *Ascl1* is transcribed in most RGLs (radial GFAP+ cells) in *Ascl1*<sup>KiGFP</sup> mice while *Ascl1* protein is only detectable in a small fraction of RGLs. n=3.

(C) Immunolabeling for GFP, Ki67 and GFAP in the SGZ of the DG of *Ascl1*<sup>KiGFP</sup> reporter mice. White arrows indicate GFP+Ki67- RGLs; yellow arrows indicate GFP+Ki67+ RGLs. Scale bar, 30µm.

(D, E) Quantification of the data in (C). Most quiescent (Ki67-) RGLs express GFP and therefore transcribe *Ascl1* (D) and the levels of GFP are not significantly different in quiescent and proliferating RGLs (E), indicating that *Ascl1* is transcribed uniformly in the two RGL populations. p values,  $p > 0.05$  (ns). n=3.

(F) RNA *in situ* hybridization by RNAscope® with an *Ascl1* probe (magenta) and a Ki67 probe (green) and immunolabeling for tdTomato to mark RGLs in the SGZ of the DG. To label RGLs with tdTomato, *Glast-CreERT2;tdTomato* mice were injected once at P60 with 4-hydroxytamoxifen, and analysed 48h later. White arrows indicate RGLs positive for *Ascl1* RNA staining; yellow arrows show RGLs positive for both *Ascl1* and Ki67 RNA. Magnifications of the RGLs marked by white boxes are shown on the right, highlighting an RGL positive for both *Ascl1* and Ki67 RNA, and an RGL positive for only *Ascl1* RNA. Dotted lines show the outline of the tdTomato signal. Scale bar, 10µm. n=5.

(G) Quantification of the data in (F). *Ascl1* transcripts are found at a similar level in quiescent (Ki67-) and proliferating (Ki67+) RGLs. Note the high variability in the levels of *Ascl1* mRNA, which could be a reflection of the oscillatory nature of *Ascl1* expression (Imayoshi et al., 2013). p values,  $p > 0.05$  (ns). n=5. Data are presented as mean +/- SEM, in this figure and all subsequent figures.

## Figure 2. *Ascl1* is regulated post-translationally in quiescent NSC cultures

(A) Transcript levels for *Ascl1* in hippocampus-derived NSC cultures treated with FGF2 alone (proliferating NSCs) or FGF2 and BMP4 (quiescent NSCs) analysed by QPCR. *Ascl1* mRNA levels are unchanged in FGF2+BMP4-treated, quiescent NSCs.  $p > 0.05$  (ns), n=3.

(B) Immunolabeling for GFP and DAPI staining in FGF2 and FGF2+BMP4-treated NSC cultures originating from *Ascl1*<sup>KiGFP</sup> mice. Scale bar, 30µm.

(C) Quantification of the data in (B). GFP, which reports transcription of the *Ascl1* gene, is expressed at similar levels in proliferating and quiescent NSCs.  $p > 0.05$  (ns). The data show one representative experiment, n=3.

(D) Immunolabeling for *Ascl1* and DAPI staining in FGF2- and FGF2+BMP4-treated NSC cultures. Scale bar, 30µm.

(E) Quantification of the data in (D). *Ascl1* levels are high in many proliferating NSCs and not detectable in most quiescent NSCs. The heterogeneity of *Ascl1* expression in proliferating NSCs most likely reflects its oscillatory behaviour.  $p < 0.0001$  (\*\*\*\*). n=3.

(F) Western blot analysis and quantification of Ascl1 in FGF2- and FGF2+BMP4-treated NSCs. BMP4 suppresses Ascl1 protein expression.  $p < 0.05$  (\*).  $n = 3$

(G) Western blot analysis of Ascl1 in FGF2+BMP4-treated NSCs after treatment with the proteasome inhibitor MG132 for different durations or with DMSO vehicle as a control. Ascl1 can be detected after proteasome inhibition in quiescent NSCs.

See also Figure S1.

### **Figure 3. Id4 is a candidate regulator of Ascl1 protein expression in quiescent hippocampal stem cells**

(A) Transcript levels for the four *Id* genes (*Id1*, *Id2*, *Id3*, *Id4*) in FGF2- and FGF2+BMP4-treated NSCs cultures analysed by QPCR. BMP strongly induces the *Id* genes.  $p > 0.05$  (ns),  $p < 0.05$  (\*),  $p < 0.01$  (\*\*),  $p < 0.0001$  (\*\*\*\*).  $n = 3$ .

(B) Western blot analysis and quantification of Id4 and E47 in FGF2- and FGF2+BMP4-treated NSCs. BMP4 upregulates Id4 protein expression; E47 expression is unchanged.  $p < 0.001$  (\*\*\*).  $n = 3$

(C) Immunolabeling for Id4 and Ascl1 in FGF2- and FGF2+BMP4-treated NSCs. Scale bar, 30 $\mu$ m.

(D-E) Quantifications of the data in (C). (D) BMP4 treatment increases Id4 protein levels in NSCs.  $p < 0.0001$  (\*\*\*\*).  $n = 3$ . (E) Id4 protein is expressed at high levels in NSCs expressing low levels of Ascl1 protein. Dotted lines show the threshold for positive staining for each protein.  $P < 0.05$  (\*), two-sided Fisher's exact test.  $n = 3$ .

(F) Immunoprecipitation of the Ascl1 dimerisation partner E47 from FGF2- and FGF2+BMP4-treated NSCs, followed by western blot analysis of GFP(Ascl1Venus) and Id4. E47 co-immunoprecipitates with GFP in FGF2 conditions but with Id4 in FGF2+BMP4 conditions. An antibody against V5 is used for the negative control.

(G) Immunolabeling for Id4, Ki67 and GFAP and staining for DAPI in hippocampal RGLs. Scale bar, 30 $\mu$ m.

(H) Quantification of the data in (G). Id4 is expressed at high levels in quiescent (Ki67-) RGLs and at low levels or is not expressed in proliferating (Ki67+) RGLs.  $p < 0.0001$  (\*\*\*\*).  $n = 3$ .

See also Figures S2 and S3.

### **Figure 4. Id4 suppresses Ascl1 expression and cell proliferation in NSC cultures**

(A) Immunolabeling for Ascl1 and Id4 and staining for DAPI in Id4-overexpressing, FGF2-treated NSCs. White arrows show low Ascl1 levels in Id4-overexpressing cells. Scale bar, 30 $\mu$ m.

(B) Quantification of the data in (A). Ascl1 protein expression is strongly reduced by Id4 overexpression.  $p < 0.0001$  (\*\*\*\*). The data show one representative experiment,  $n = 3$ .

(C) Ascl1 mRNA levels in FACS sorted FGF2-treated NSCs transfected with a GFP-expressing control or Id4-expression construct. Ascl1 mRNA levels are not changed by Id4 overexpression.  $p > 0.05$  (ns).  $n = 3$ .

(D) Model of Ascl1 monomerization and elimination following Id4 overexpression in proliferating NSC cultures.

(E) Immunolabeling for Ki67 and Id4 (upper panels) and staining for EdU and immunolabeling for Id4 (lower panels) in Id4-overexpressing, FGF2-treated NSCs. EdU was administered to the cultured cells one hour before fixation. White arrows indicate absence of Ki67 and EdU in Id4-overexpressing cells. Scale bar, 30 $\mu$ m.

(F) Quantification of the data in (E). Id4 overexpression reduces NSC proliferation.  $p > 0.05$  (ns),  $P < 0.05$  (\*).  $n = 4$  for Ki67 and  $n = 3$  for EdU.

(G) Immunolabeling for Ascl1 and GFP with DAPI staining, in E47:GFP-overexpressing, FGF2+BMP4-treated NSCs. White arrows indicate Ascl1-positive, E47-overexpressing quiescent cells. Scale bar, 30 $\mu$ m.

(H-I) Quantification of the data in (G). Titration of Id proteins by E47 results in a significant increase in Ascl1 protein expression without significant change in Ascl1 RNA levels (I).  $p > 0.05$  (ns),  $P < 0.05$  (\*).  $n = 3$

(J) Immunolabeling for GFP and Ki67 and staining for EdU in E47:GFP-overexpressing, FGF2+BMP4-treated NSCs. White arrows indicate Ki67- or EdU-positive, E47-overexpressing quiescent cells. Scale bar, 30 $\mu$ m.

(K) Quantification of the data in (J). Titration of Id proteins by E47 reverts the proliferation arrest of BMP4-treated NSCs.  $p > 0.05$  (ns),  $P < 0.05$  (\*).  $n = 3$ .

(L) Model of Id protein titration by E47 overexpression in quiescent NSC cultures.

### Figure 5. Id4 regulation of Ascl1 targets contributes to BMP-induced NSC quiescence

(A) Volcano plot displaying gene expression changes between control and Id4-overexpressing FGF2-treated NSCs analysed by RNA-Seq.

(B) Venn diagram indicating the number of genes de-regulated by addition of BMP4 or Id4 overexpression or both in FGF2-treated cultures.

(C-D) Gene Ontology terms associated with genes up- or down-regulated by both addition of BMP4 and Id4 overexpression in FGF2-treated cultures. Dots are coloured based on their ontology terms; light blue: cell cycle/division; dark blue: DNA repair/replication; light green: Protein phosphorylation/modification; dark green: signalling, transcription; orange: adhesion/cytoskeleton; yellow: ion-related; pink: brain/nervous system related.

(E) Downregulation of Ascl1 target genes in FGF2-treated cultures overexpressing Id4 and analysed by RNA-Seq, including genes involved in cell cycle regulation (*Skp2*, *Cdk1*, *Cdk2* and *Foxm1*) RGL activation (*Egfr*), canonical Ascl1 targets (*Dll1* and *Dll3*) and other Ascl1 targets previously identified in NSCs (*Birc5*, *Rrm2* and *Fbl*).  $p < 0.001$  (\*\*\*) ,  $p < 0.0001$  (\*\*\*\*).  $n=3$ .

(F) Down regulation of cell cycle genes in FGF2-treated cultures overexpressing Id4 and analysed by RNA-Seq.  $p > 0.05$  (ns),  $p < 0.0001$  (\*\*\*\*).  $n=3$ .

See also Figure S4.

### Figure 6. Loss of Id4 results in activation of quiescent RGLs in the adult hippocampus

(A) Design of the experiment of deletion of Id4 from RGLs of the adult hippocampus using *Id4<sup>ckO</sup>* mice.

(B) Immunolabeling for GFAP and Id4 demonstrating Id4 elimination in *Id4<sup>ckO</sup>* mice after 5 days of tamoxifen administration. Scale bar, 30 $\mu$ m.

(C) Immunolabeling for GFAP and Ascl1 in control and *Id4<sup>ckO</sup>* and control mice after 5 days of tamoxifen administration. White arrows indicate Ascl1-positive RGLs. Scale bar, 30 $\mu$ m.

(D) Quantification of the data in (C). Loss of Id4 results in increases in the number of Ascl1-expressing cells and in the levels of Ascl1 protein in RGLs.  $p < 0.05$  (\*),  $p < 0.0001$  (\*\*\*\*).  $n=5$  for both control and *Id4<sup>ckO</sup>*.

(E) Immunolabeling for GFAP and Ki67 in control and *Id4<sup>ckO</sup>* mice. White arrows indicate Ki67-positive RGLs. Scale bar, 30 $\mu$ m.

(F) Quantification of the data in (E). Loss of Id4 results in an increase in the fraction of proliferating RGLs.  $p < 0.05$  (\*).  $n=5$  for both control and *Id4<sup>ckO</sup>*.

See also Figure S5.

### Figure 7. Roles of the Notch and BMP pathways in regulation of Id4 expression

(A) Design of the experiments of inactivation of the BMP pathway in hippocampal RGLs.

(B) Immunolabeling for Id4 and GFAP in the DG of *Smad4<sup>CKO</sup>* and control mice 5 days after the first tamoxifen administration. Scale bar, 30 $\mu$ m.

(C) Quantification of the data in (B). The number of Id4 expressing RGLs is unchanged while the levels of Id4 are significantly increased in the absence of BMP-Smad4 signaling.  $p > 0.05$  (ns),  $p < 0.01$  (\*\*),  $p < 0.0001$  (\*\*\*\*).  $n = 3$  for control and  $n = 4$  for *Smad4<sup>CKO</sup>*.

(D) Immunolabeling for Id1 and GFAP in the DG of *Smad4<sup>CKO</sup>* and control mice 5 days after the first tamoxifen administration. Scale bar, 30 $\mu$ m.

(E) Quantification of the data in (D). Id1 expression in hippocampal RGLs is strongly reduced in the absence of BMP-Smad4 signaling.  $p < 0.05$  (\*).  $n = 3$  for control and *Smad4<sup>CKO</sup>*.

(F) The fractions of RGLs expressing Ascl1 and proliferating are unchanged in *Smad4<sup>CKO</sup>* mice indicating that a reduction in Id1 does not increase Ascl1 levels or RGL activation.  $p > 0.05$  (ns).  $n = 3$ .

(G) Design of the experiments of inactivation of the Notch or Notch+BMP pathways in hippocampal RGLs. More time was allowed after tamoxifen than in (A) to ensure the elimination of the very stable RBPJk protein.

(H) Immunolabeling for Id4 and GFAP in the DG of *RBPJk<sup>CKO</sup>* and control mice 10 days after the first tamoxifen administration. Scale bar, 30 $\mu$ m.

(I) Quantification of the data in (H). A slightly lower number of RGLs are positive for Id4, while its levels are unaffected by the loss of *RBPJk*.  $p > 0.05$  (ns),  $p < 0.05$  (\*).  $n = 4$  for control and *RBPJk<sup>CKO</sup>*. Scale bar, 30 $\mu$ m.

(J) Immunolabeling for Id4 in the DG of *Smad4<sup>CKO</sup>;RBPJk<sup>CKO</sup>* and control mice 10 days after the first tamoxifen administration. Scale bar, 30 $\mu$ m.

(K) Quantification of the data in (J). Expression of Id4 is only moderately reduced in the absence of both *Smad4* and *RBPJk*.  $p > 0.05$  (ns),  $p < 0.01$  (\*\*).  $n = 3$  for control and *Smad4<sup>CKO</sup>;RBPJk<sup>CKO</sup>*.

See also Figure S6.

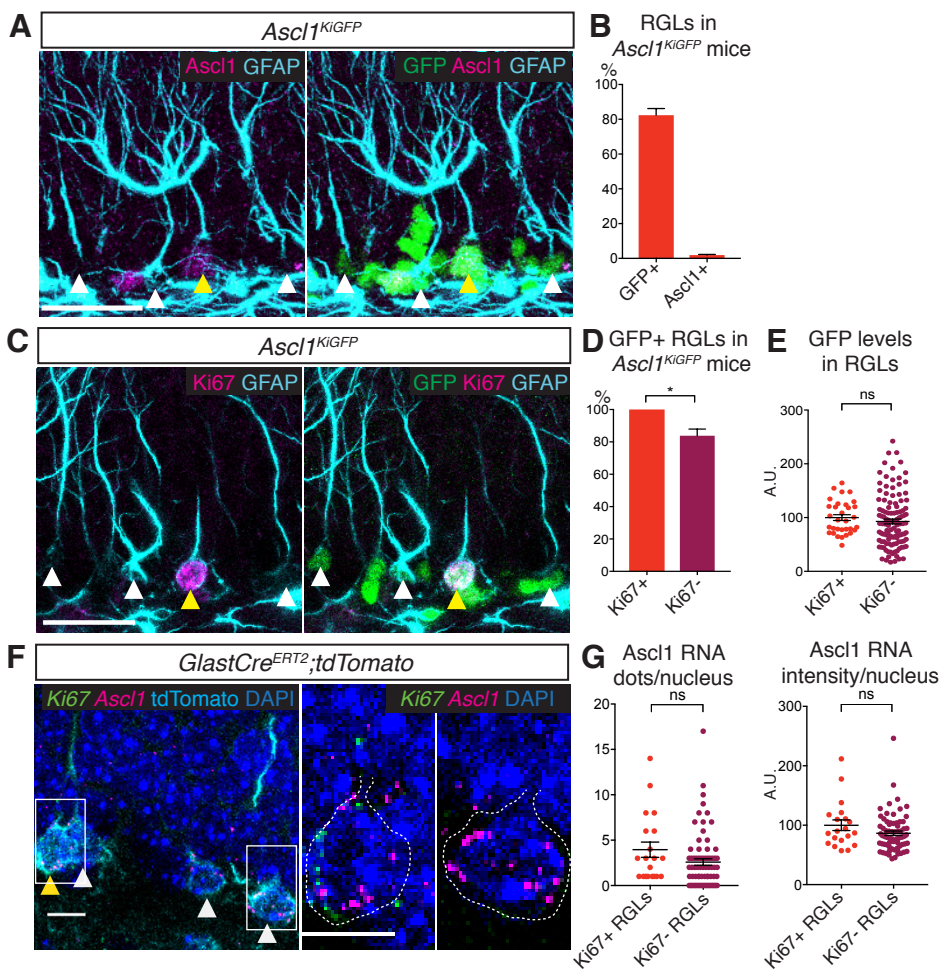



Figure 2

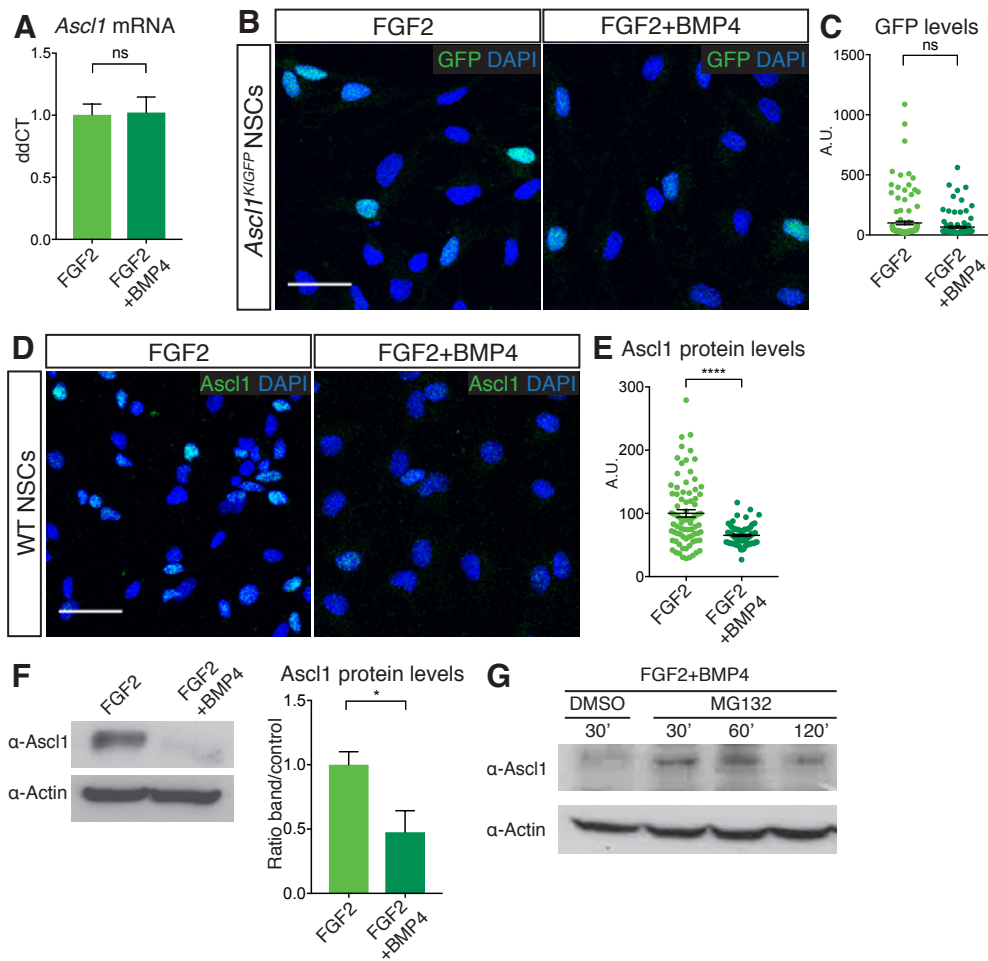

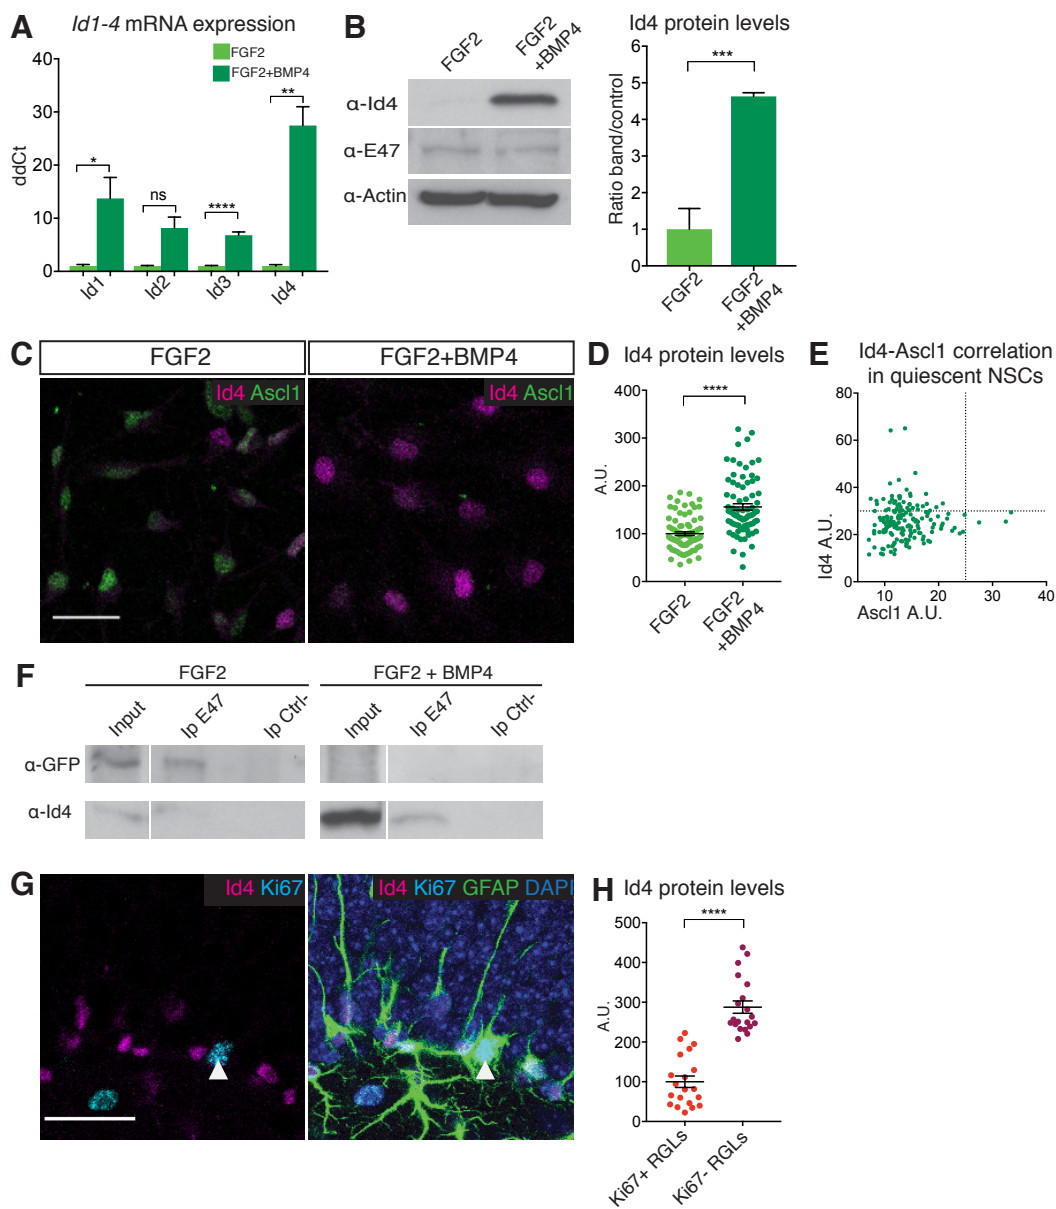

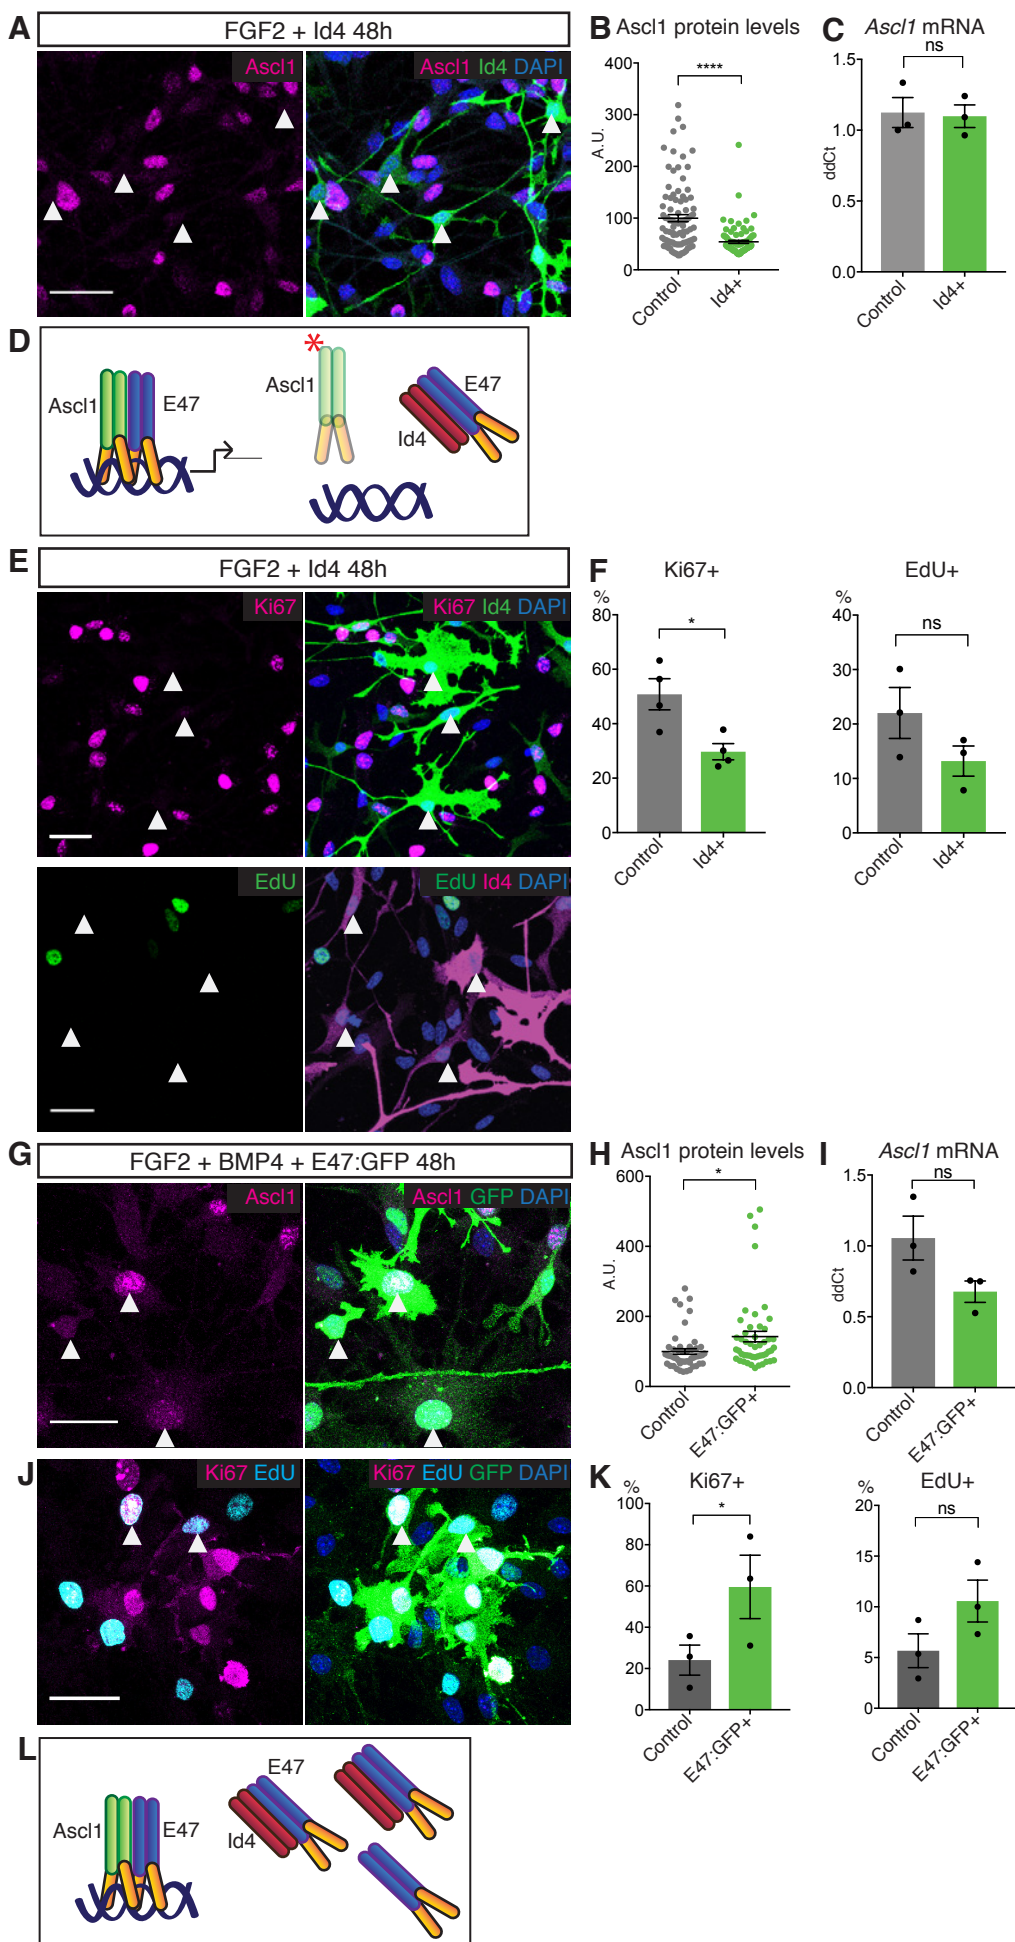

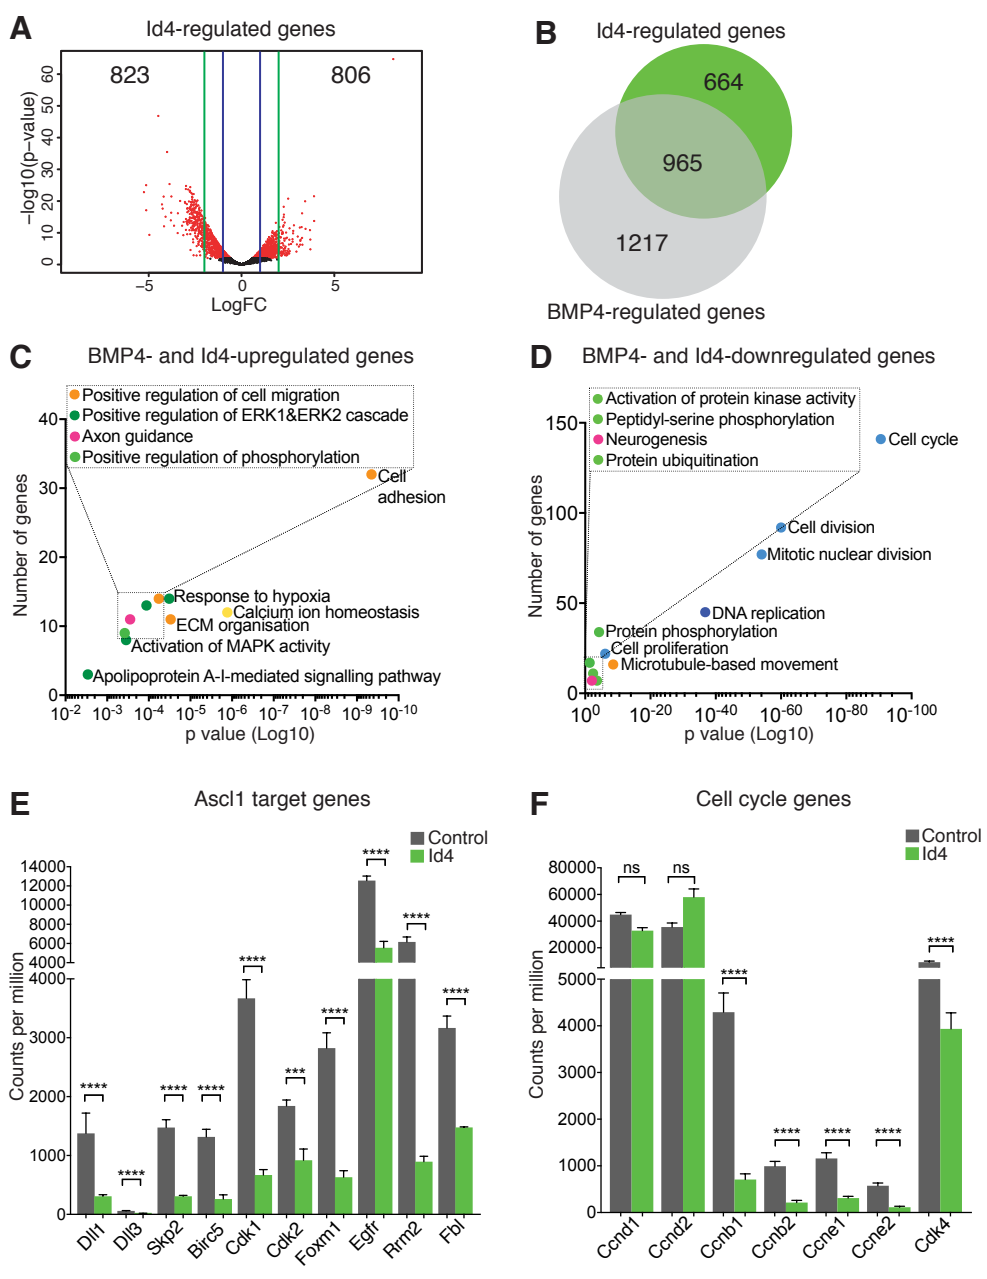



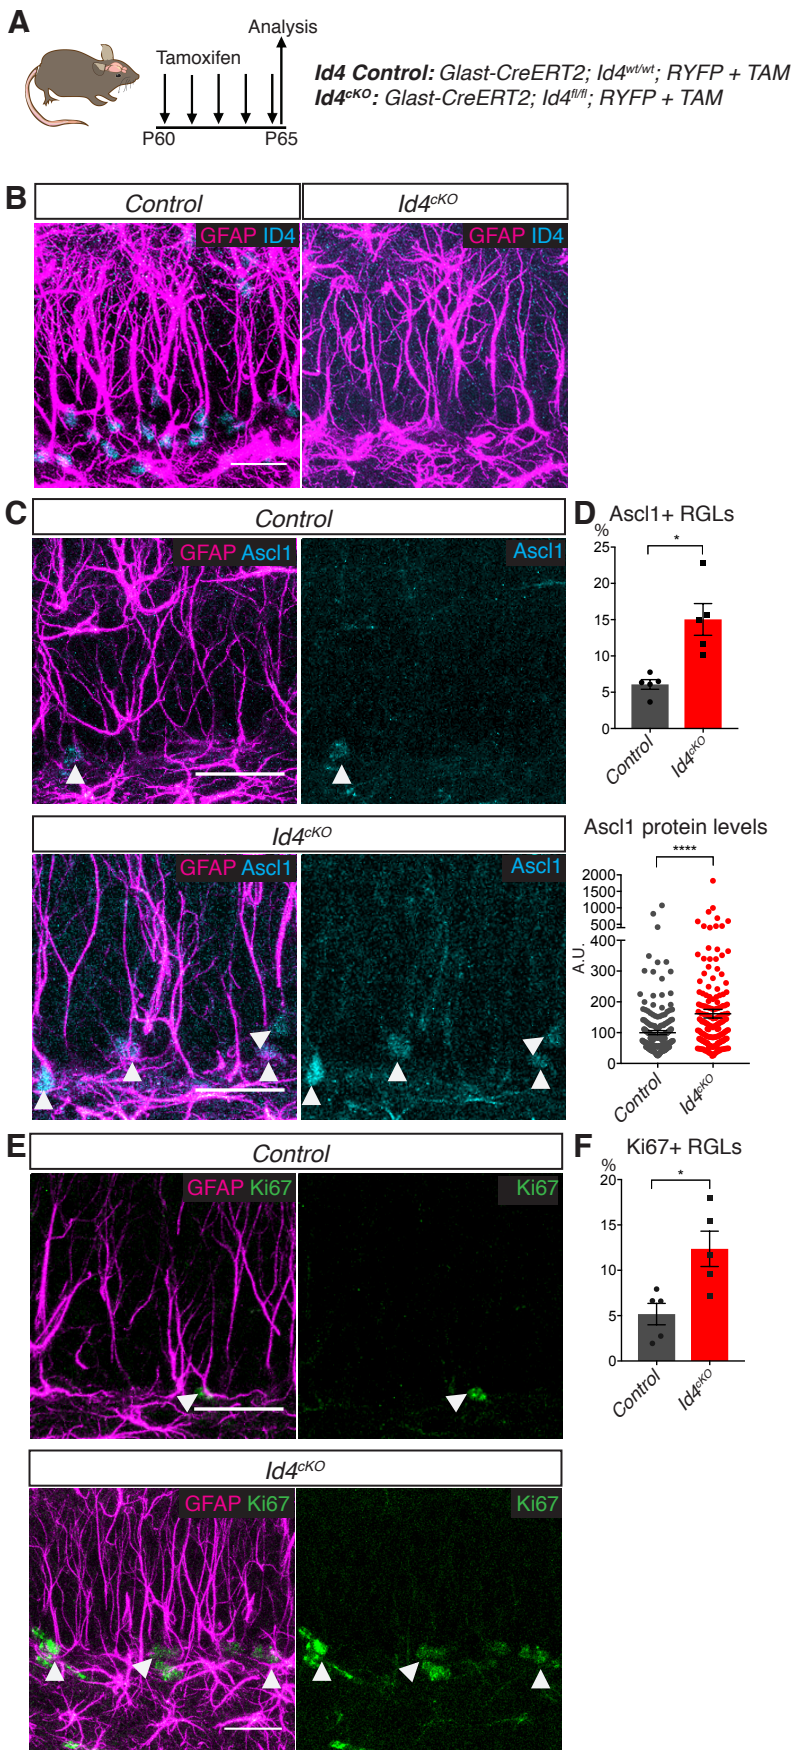

**A**

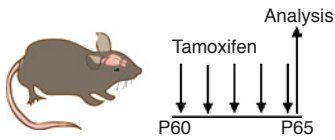

**Smad4 control:** *Glast-CreERT2; Smad4<sup>fl/wt</sup>; Rosa26-EYFP + TAM*  
**Smad4<sup>cKO</sup>:** *Glast-CreERT2; Smad4<sup>fl/fl</sup>; Rosa26-EYFP + TAM*

**B**

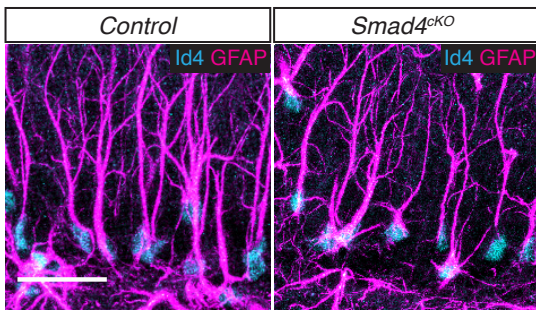

**C**

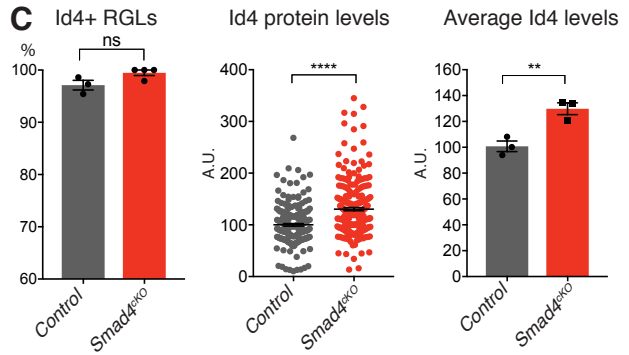

**D**

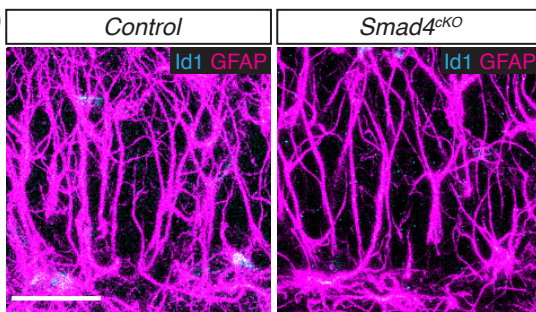

**E**

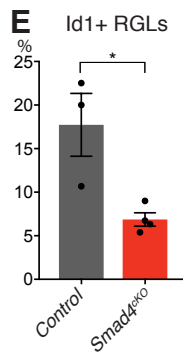

**F**

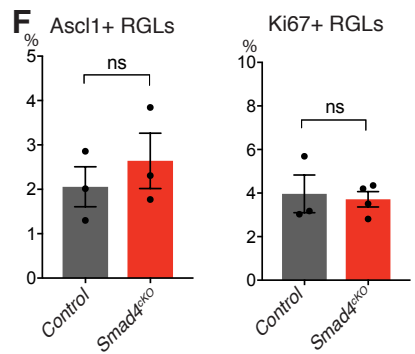

**G**

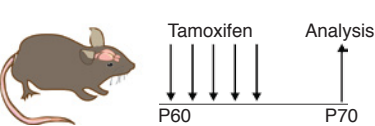

**RBPJk control:** *Glast-CreERT2; RBPJk<sup>fl/wt</sup>; Rosa26-EYFP + TAM*  
**RBPJk<sup>cKO</sup>:** *Glast-CreERT2; RBPJk<sup>fl/fl</sup>; Rosa26-EYFP + TAM*  
**Smad4;RBPJk control:** *Glast-CreERT2; Smad4<sup>fl/wt</sup>; RBPJk<sup>fl/wt</sup>; Rosa26-EYFP + TAM*  
**Smad4<sup>cKO</sup>;RBPJk<sup>cKO</sup>:** *Glast-CreERT2; Smad4<sup>fl/fl</sup>; RBPJk<sup>fl/fl</sup>; Rosa26-EYFP + TAM*

**H**

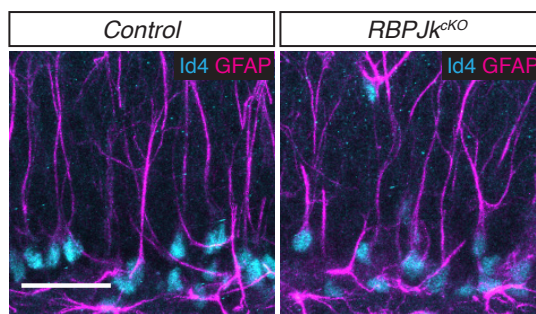

**I**

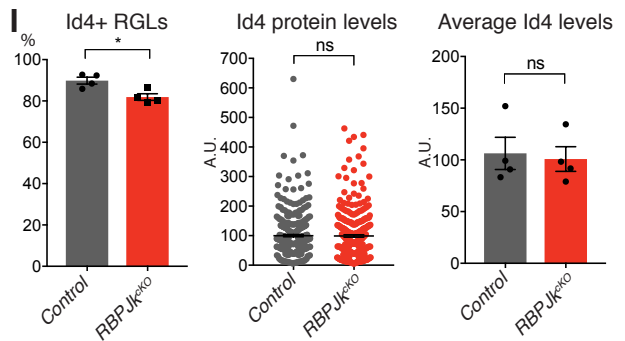

**J**

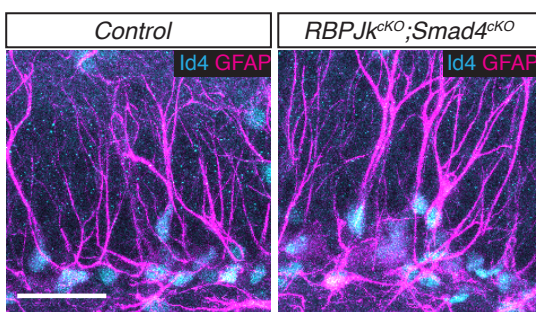

**K**

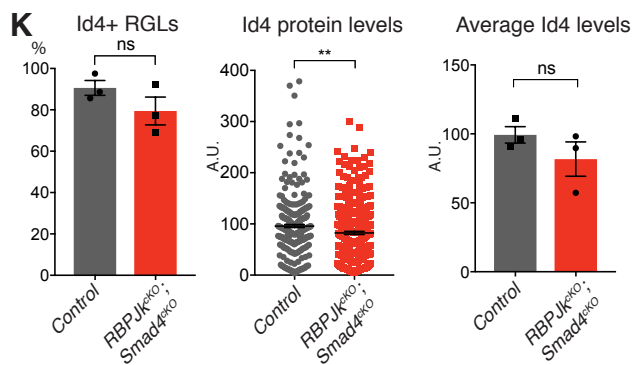

Source: https://www.biorxiv.org/content/biorxiv/early/2018/09/25/426015.full.pdf
